# Supplementary material
Source: publisher figshare collection journal article supplement (https://acs.figshare.com/ndownloader/files/4470646)
Supplement: Supplementary file 1 [file 4470646]

## Supporting Information Experimental

# Phosphine-Catalyzed Asymmetric Synthesis of $\beta$ -Lactones from Ketoketenes and Aromatic Aldehydes

Mukulesh Mondal<sup>a</sup>, Ahmad A. Ibrahim<sup>a</sup>, Kraig A. Wheeler<sup>b</sup> and Nessian J. Kerrigan<sup>a\*</sup>

<sup>a</sup>Department of Chemistry, Oakland University, 2200 N. Squirrel Road, Rochester, MI 48309-4477, USA

<sup>b</sup>Department of Chemistry, Eastern Illinois University, 600 Lincoln Avenue, Charleston, IL 61920-3099, USA

### Table of Contents:

|                                                                                                                          |       |
|--------------------------------------------------------------------------------------------------------------------------|-------|
| General Information                                                                                                      | SI-2  |
| Procedure A for $\beta$ -lactone synthesis                                                                               | SI-2  |
| Procedure B for $\beta$ -hydroxyacid synthesis                                                                           | SI-3  |
| Experimental Procedure for <b>3a</b> and <b>4a</b>                                                                       | SI-3  |
| Experimental Procedure for <b>3b</b> , <b>4b</b> , <b>3c</b> and <b>4c</b>                                               | SI-4  |
| Experimental Procedure for <b>3c</b> , <b>5c</b> , <b>3d</b> and <b>4d</b>                                               | SI-5  |
| Experimental Procedure for ( $\pm$ )- <b>3d</b> , <b>3e</b> and <b>4e</b>                                                | SI-6  |
| Experimental Procedure for <b>3f</b> , <b>4f</b> , <b>3g</b> and <b>4g</b>                                               | SI-7  |
| Experimental Procedure for <b>3h</b> , <b>3i</b> , <b>4i</b> , <b>3j</b> and <b>4j</b>                                   | SI-8  |
| Experimental Procedure for <b>3k</b> and <b>4k</b>                                                                       | SI-9  |
| Experimental Procedure for <b>3l</b> , <b>4l</b> , <b>3m</b> and <b>4m</b>                                               | SI-10 |
| Experimental Procedure for <b>3n</b> and<br>Control Reactions and Mechanistic Studies                                    | SI-11 |
| References                                                                                                               | SI-12 |
| Determination of <i>trans</i> Relative Stereochemistry:<br>X-Ray Crystallographic data for Compound ( $\pm$ )- <b>3d</b> | SI-13 |
| Determination of Absolute Stereochemistry:<br>X-Ray Crystallographic data for Compound <b>3n</b>                         | SI-19 |

## General Information.

Diethyl ether and THF were freshly distilled from benzophenone ketyl radical under nitrogen prior to use. Dichloromethane was dried using a calcium hydride stills and *N,N*-dimethylethylamine was distilled from calcium hydride under nitrogen.<sup>1</sup> Tri-*n*-butylphosphine, (*R*)-BINAPHANE, lithium iodide, benzaldehyde, 2-chlorobenzaldehyde, 4-chlorobenzaldehyde 4-nitrobenzaldehyde, pentanal, hydrocinnamaldehyde, cinnamaldehyde, potassium hydroxide and sodium azide were purchased from Aldrich Chemical Co. Iatrobeads (Bioscan, 6RS-8060, 60 $\mu$ M particle size). TLC plates (Sorbent Technologies, UV254, 250 $\mu$ M) were used as received. Methylphenylketene, ethylphenylketene, *n*-butylphenylketene, methyl-4-tolylketene, methyl-2-tolylketene diphenylketene, and ethyl-*N*-methylindolylketene were prepared according to literature procedures.<sup>2-4</sup>

NMR spectra were recorded on Bruker DPX Avance 200 spectrometer (200 MHz for <sup>1</sup>H and 50 MHz for <sup>13</sup>C) and on Bruker Biospin AG 400 spectrometer (400 MHz for <sup>1</sup>H and 100 MHz for <sup>13</sup>C). NMR chemical shifts were reported relative to TMS (0 ppm) for <sup>1</sup>H and to CDCl<sub>3</sub> (77.23 ppm) for <sup>13</sup>C spectra. High resolution mass spectra were obtained from the College of Sciences Major Instrumentation Cluster at Old Dominion University. Optical rotations were measured on Rudolph DigiPol 781 TDV automatic polarimeter. IR spectra were recorded on a Bio Rad FTS-175C spectrometer.

Analytical high performance liquid chromatography (HPLC) was performed using a Daicel Chiralpak AD column (0.46 cm x 25 cm) and an AS-H column (0.46 cm x 25 cm) (Daicel Chemical Ind., Ltd.) on a Perkin Elmer 235C instrument attached with diode array detector (deuterium lamp, 190-600 nm) with HPLC-grade isopropanol and hexanes as the eluting solvents.

**Compound Characterization and Determination of Diastereomeric Ratios and Enantiomeric Excesses:** Most of the  $\beta$ -lactones **3** appear to be unstable during attempted flash column chromatographic purification. The phosphine catalyst was removed by passing a dilute solution of the reaction mixture through a plug column of neutral silica (see procedure A), without causing decomposition of the  $\beta$ -lactones **3** (obtained in 70-99% purity). In order to provide characterization data for all compounds, the impure  $\beta$ -lactones (<95% purity) were converted into the corresponding stable  $\beta$ -hydroxyacids **4** by treatment with aqueous KOH in THF. The  $\beta$ -hydroxyacids **4** were purified by flash column chromatography to provide pure samples for full characterization (see procedure B). Diastereomeric ratios were determined for the crude  $\beta$ -lactones **3a-n** either by integrating the tertiary **CH** resonances in <sup>1</sup>H NMR or by comparing the peak areas of HPLC data. Enantiomeric excesses were determined by assaying the crude  $\beta$ -lactones **3a-n** using chiral HPLC analysis (at  $\lambda$ =225 nm; details given for each compound). Authentic racemic samples for chiral HPLC analysis were generated through the PBu<sub>3</sub>-catalyzed reaction (Procedure A).

**Procedure A for  $\beta$ -lactone synthesis:** To a stirring solution of aldehyde (0.34-1.02 mmol, 1.0-3.0 equiv.) and phosphine catalyst (PBu<sub>3</sub> or BINAPHANE) (0.034 mmol, 0.1 equiv.) in dichloromethane (0.40 mL) at -78 °C under nitrogen atmosphere, was added a solution of ketoketene (0.34 mmol, 1.0 equiv.) in dichloromethane (0.40 mL) [overall ketene concentration 0.43M] over a period of 4 h using syringe pump and stirring was continued at -78 °C. After 4 h, the reaction was allowed to warm up to room temperature gradually over 4 h in the cooling bath (total reaction time = 12 h). The reaction was then quenched by addition of dilute H<sub>2</sub>O<sub>2</sub> (0.002 mL, 0.038 mmol, 0.1 equiv), diluted with 10% EtOAc/hexane (10 mL) and dichloromethane (2.5 mL) [for ~100 mg reaction mixture] and the crude solution was passed through a plug column of

### SI-3

neutral silica (iatrobeads, 2 × 2 cm, 5 g) [50 × reaction mixture]. The plug column was eluted with 10% EtOAc/Hexane solvent system (100 mL), and the solvent was removed under vacuum to furnish the desired  $\beta$ -lactone **3a-n** with 70–>99% purity (as determined by GC-MS or  $^1\text{H}$  NMR analysis).

**Procedure B for  $\beta$ -hydroxyacid synthesis:** A stirring mixture of  $\beta$ -lactone **3** (0.30 mmol, 1.0 equiv.) and aqueous KOH (1.0 N; 0.60 mL, 0.60 mmol, 2.0 equiv.) in THF (1.2 mL) was heated to 60 °C in a sealed tube for 6–12 h. After cooling, the reaction mixture was diluted with water (2 mL), extracted with dichloromethane (30 mL) to remove undesired product. The aqueous layer was acidified with HCl (10%), extracted with dichloromethane (20 mL × 3) and combined extracts were washed with brine and dried over  $\text{Na}_2\text{SO}_4$ . Removal of the solvent under vacuum followed by column chromatographic purification using hexane/EtOAc solvent system furnished the desired  $\beta$ -hydroxyacid. Isolated yields are determined for two steps from the relevant ketoketene.

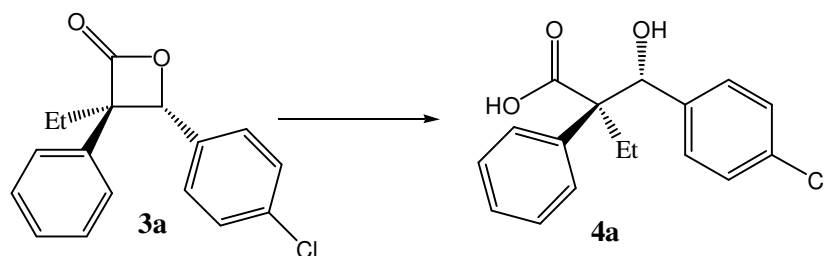

**(3R,4R)-4-(4-Chlorophenyl)-3-ethyl-3-phenyloxetan-2-one**

**(3a):** Following procedure A, ethylphenylketene (51 mg, 0.35 mmol) was added to 4-chlorobenzaldehyde (49 mg, 0.35 mmol) and (*R*)-BINAPHANE (25 mg, 0.035

mmol). **3a** was obtained as a colorless oil (94 mg, 94% yield, 96% purity by  $^1\text{H}$  NMR), dr 93:7 (by HPLC); HPLC analysis: 64% ee [Daicel Chiralpak AS-H column; 0.5 mL/min; solvent system: 10% isopropanol in hexane; retention times: 11.6 min (major), 16.7 min (minor)];  $[\alpha]_D^{24} = -34.0$  ( $c = 0.10$ ,  $\text{CHCl}_3$ ); IR (thin film): 2933, 1827, 1092  $\text{cm}^{-1}$ ;  $^1\text{H}$  NMR (400 MHz,  $\text{CDCl}_3$ , TMS)  $\delta$  7.40–7.28 (m, 9H), 5.58 (s, 1H), 1.70–1.61 (m, 1H), 1.45–1.18 (m, 1H), 0.58 (t,  $J = 6.0$  Hz, 3H);  $^{13}\text{C}$  NMR (100 MHz,  $\text{CDCl}_3$ ):  $\delta$  171.8, 137.5, 135.0, 133.6, 129.3, 129.3, 128.2, 127.4, 126.5, 82.3, 68.8, 27.4, 8.5; MS (EI 70 eV)  $m/z$  242, 227, 192. Satisfactory HRMS data was not obtained for **3a**, so it was converted to **4a** to provide full characterization data.

**(2R)-2-((R)-(4-Chlorophenyl)hydroxymethyl)-2-phenylbutanoic acid (4a):** Procedure B was followed employing **3a** (94 mg, 96% purity), aqueous KOH (0.63 mL, 0.63 mmol) and a reaction time of 6 hours. Elution with 25% EtOAc/hexane followed by solvent removal under reduced pressure yielded **4a** as a white gum (93 mg, 87% yield for two steps), dr 93:7 (by HPLC);  $[\alpha]_D^{22} = -38.0$  ( $c = 0.53$ ,  $\text{CHCl}_3$ ); IR (thin film): 2964, 2935, 1700  $\text{cm}^{-1}$ ;  $^1\text{H}$  NMR (400 MHz,  $\text{CDCl}_3$ , TMS)  $\delta$  7.27–7.22 (m, 3H), 7.06–7.02 (m, 4H), 6.74–6.72 (d,  $J = 8.4$  Hz, 2H), 5.26 (s, 1H), 2.11–2.02 (m, 1H), 1.90–1.80 (m, 1H), 0.98 (t,  $J = 7.4$  Hz, 3H);  $^{13}\text{C}$  NMR (100 MHz,  $\text{CDCl}_3$ )  $\delta$  179.9, 138.4, 137.2, 133.9, 129.2, 128.6, 128.1, 127.9, 127.9, 78.5, 60.7, 25.0, 10.1; ( $\text{M}^+ + \text{Na}$ ) HRMS  $m/z$  calcd for  $\text{C}_{17}\text{H}_{17}\text{ClO}_3\text{Na}$ : 327.0758; Found: 327.0759.

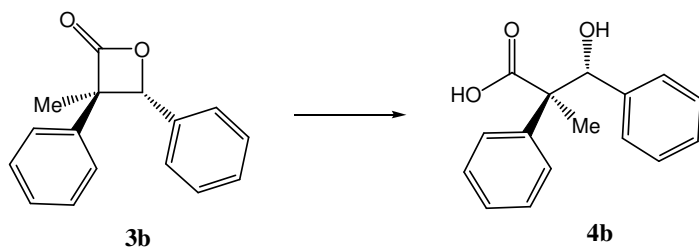

**(3R,4R)-3-Methyl-3,4-diphenyloxetan-2-one (3b):** Following procedure A, methylphenylketene (45 mg, 0.34 mmol) was added to benzaldehyde (36 mg, 0.34 mmol) and (*R*)-BINAPHANE (24 mg, 0.034 mmol). **3b** was obtained as colorless oil (80 mg, 90% purity by  $^1\text{H}$  NMR), dr 96:4 (by  $^1\text{H}$  NMR); HPLC

analysis for **3b**: 79% ee [Daicel Chiralpak AS-H column; 0.5 mL/min; solvent system: 10% isopropanol in hexane; retention times: 12.7 min (major), 18.3 min (minor)].

**(2R,3R)-3-Hydroxy-2-methyl-2,3-diphenylpropanoic acid (4b):** Procedure B was followed employing **3b** (80 mg, 90% purity), aqueous KOH (0.60 mL, 0.60 mmol) and a reaction time 4 h. Elution with 20% EtOAc/hexane followed by solvent removal under reduced pressure yielded **4b** as white gum (76 mg, 87% yield for two steps), dr >96:4 (by  $^1\text{H}$  NMR);  $[\alpha]_D^{23} = -130.3$  ( $c = 0.76$ , EtOAc); IR (CHCl<sub>3</sub>): 3569, 3491, 3022, 1699 cm<sup>-1</sup>;  $^1\text{H}$  NMR (400 MHz, CDCl<sub>3</sub>, TMS):  $\delta$  7.34-7.29 (m, 3H), 7.26-7.09 (m, 5H), 6.84 (d,  $J = 7.2$  Hz, 2H), 5.48 (s, 1H), 1.60 (s, 3H);  $^{13}\text{C}$  NMR (100 MHz, CDCl<sub>3</sub>):  $\delta$  182.1, 139.3, 138.3, 128.6, 127.9, 127.7, 127.6, 127.4, 127.0, 78.4, 56.5, 15.2; ( $\text{M}^+ + \text{Na}$ ) HRMS  $m/z$  calcd for C<sub>16</sub>H<sub>16</sub>O<sub>3</sub>Na: 279.0992; Found: 279.0990.

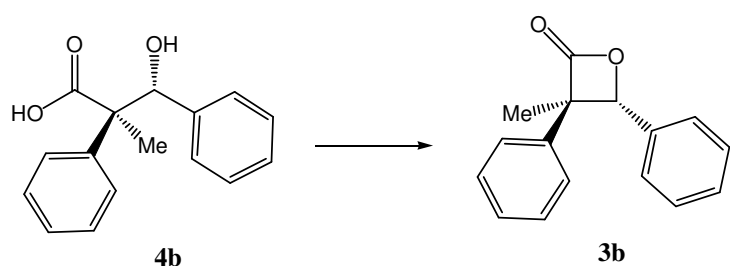

For ee determination of **4b**, **4b** was recycled to **3b**. Experimental procedure: To an ice-cooled stirring solution of **4b** (26 mg, 0.10 mmol) and triethylamine (30 mg, 0.30 mmol) in CH<sub>2</sub>Cl<sub>2</sub> (0.6 mL), benzoylchloride (28 mg, 0.20 mmol) was added dropwise and stirring was continued for 1 h at 0

°C. Then the reaction mixture was passed through a plug column of neutral silica (like general procedure A), and the solvent was removed under vacuum to furnish the desired  $\beta$ -lactone **3b** (>99% purity) as a colorless oil (9 mg, 37% yield), dr >99:1 (by  $^1\text{H}$  NMR); HPLC analysis: 79% ee [Daicel Chiralpak AS-H column; 0.5 mL/min; solvent system: 10% isopropanol in hexane; retention times: 13.0 min (major), 18.9 min (minor)];  $[\alpha]_D^{23} = -19.3$  ( $c = 0.07$ , EtOAc); IR (Neat): 2925, 1832 cm<sup>-1</sup>;  $^1\text{H}$  NMR (400 MHz, CDCl<sub>3</sub>, TMS):  $\delta$  7.33-7.51 (m, 10H), 5.73 (s, 1H), 1.26 (s, 3H).  $^{13}\text{C}$  NMR (100 MHz, CDCl<sub>3</sub>):  $\delta$  172.9, 139.9, 135.0, 129.5, 129.1, 129.0, 128.2, 125.7, 83.0, 64.7, 20.5; ( $\text{M}^+ + \text{Na}$ ) HRMS  $m/z$  calcd for C<sub>16</sub>H<sub>14</sub>O<sub>2</sub>Na: 261.0886; Found: 261.0887.

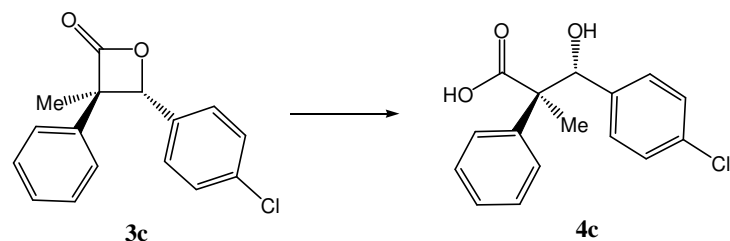

**(3R,4R)-4-(4-Chlorophenyl)-3-methyl-3-phenyloxetan-2-one (3c):** Following procedure A, methylphenylketene (50 mg, 0.38 mmol) was added to 4-chlorobenzaldehyde (53 mg, 0.38 mmol) and (*R*)-BINAPHANE (25 mg, 0.038 mmol). **3c** was obtained as a colorless oil (80 mg, 90% purity by  $^1\text{H}$  NMR), dr 95:5 (by  $^1\text{H}$  NMR); HPLC analysis: 90% ee [Daicel Chiralpak AS-H column; 0.5 mL/min; solvent system: 10% isopropanol in hexane; retention times: 17.8 min (major), 27.1 min (minor)].

**(2R,3R)-3-(4-Chloro-phenyl)-3-hydroxy-2-methyl-2-phenyl-propionic acid (4c):** Procedure B was followed employing **3c** (80 mg, 90% purity), aqueous KOH (0.53 mL, 0.53 mmol) and a reaction time of 4 h. Elution with 25% EtOAc/hexane followed by solvent removal under reduced pressure yielded **4c** as a white gum (72 mg, 65% yield for two steps), dr 96:4 (by  $^1\text{H}$

## SI-5

NMR);  $[\alpha]_D^{23} = -130.0$  ( $c = 0.42$ ,  $\text{CHCl}_3$ ); IR (thin film): 3441, 2631, 1699, 1090  $\text{cm}^{-1}$ ;  $^1\text{H}$  NMR (400 MHz,  $\text{CDCl}_3$ , TMS)  $\delta$  7.28-7.22 (m, 3H), 7.13-7.09 (m, 2H), 6.97 (d,  $J = 12.0$  Hz, 2H), 6.62 (d,  $J = 12.0$  Hz, 2H), 5.36 (s, 1H), 1.47 (s, 3H);  $^{13}\text{C}$  NMR (100 MHz,  $\text{CDCl}_3$ )  $\delta$  181.8, 138.9, 136.8, 133.5, 129.0, 128.8, 128.2, 127.6, 127.0, 77.8, 56.5, 14.7; ( $\text{M}^+ + \text{Na}$ ) HRMS  $m/z$  calcd for  $\text{C}_{16}\text{H}_{15}\text{ClO}_3\text{Na}$ : 313.0602; Found: 313.0600.

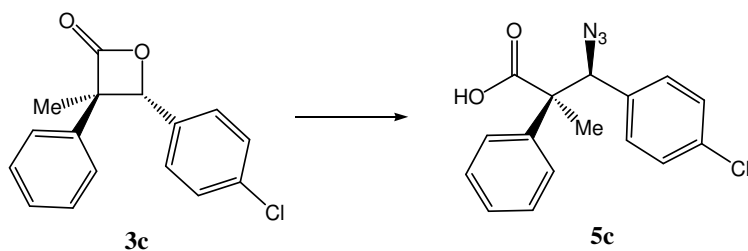

### (3R,4R)-4-(4-Chlorophenyl)-3-methyl-3-phenyloxetan-2-one (**3c**):

Following procedure A, methylphenylketene (103 mg, 0.78 mmol) was added to 4-chlorobenzaldehyde 110 mg, 0.78 mmol) and (*R*)-BINAPHANE (55 mg, 0.078 mmol). **3c** was obtained as

a colorless oil (202 mg, 90% purity by  $^1\text{H}$  NMR), dr 95:5 (by  $^1\text{H}$  NMR); HPLC analysis: 90% ee [Daicel Chiralpak AS-H column; 0.5 mL/min; solvent system: 10% isopropanol in hexane; retention times: 17.8 min (major), 27.1 min (minor)].

**(2R,3S)-3-Azido-3-(4-Chlorophenyl)-3-methyl-2-phenylpropanoic acid (**5c**):** Sodium azide (23 mg, 0.36 mmol) was added to a stirring solution of **3c** (50 mg, ~0.18 mmol) in DMSO (1.2 mL). The reaction vessel was sealed and heated to 65 °C for 48 h. After cooling, the reaction mixture was acidified with HCl (10%), and extracted with dichloromethane (20 mL x 3). The combined organics were washed with brine (20 mL x 3) and dried over  $\text{Na}_2\text{SO}_4$ . Removal of the solvent under vacuum followed by column chromatographic purification (15% EtOAc/ hexane) furnished the desired  $\beta$ -azido acid **5c** as a white gum (32 mg, 61% yield), dr >99:1 (by  $^1\text{H}$  NMR); HPLC analysis: 90% ee [Daicel Chiralpak AD column; 0.5 mL/min; solvent system: 2% isopropanol in hexane; retention times: 27.3 min (major), 34.8 min (minor)];  $[\alpha]_D^{23} = -133.1$  ( $c = 0.32$ , EtOAc); IR ( $\text{CHCl}_3$ ): 3345, 3019, 2108, 1703, 1493, 1215  $\text{cm}^{-1}$ ;  $^1\text{H}$  NMR (400 MHz,  $\text{CDCl}_3$ , TMS):  $\delta$  7.41-7.34 (m, 5H), 7.22 (d,  $J = 8.5$  Hz, 2H), 6.96 (d,  $J = 8.5$  Hz, 2H), 5.33 (s, 1H), 1.54 (s, 3H);  $^{13}\text{C}$  NMR (100 MHz,  $\text{CDCl}_3$ ):  $\delta$  180.7, 137.4, 134.7, 134.4, 130.7, 128.4, 128.4, 128.3, 128.3, 70.8, 55.2, 19.2; ( $\text{M}^+ + \text{Na}$ ) HRMS  $m/z$  calcd for  $\text{C}_{16}\text{H}_{14}\text{ClN}_3\text{O}_2\text{Na}$ : 338.0667; Found: 338.0665.

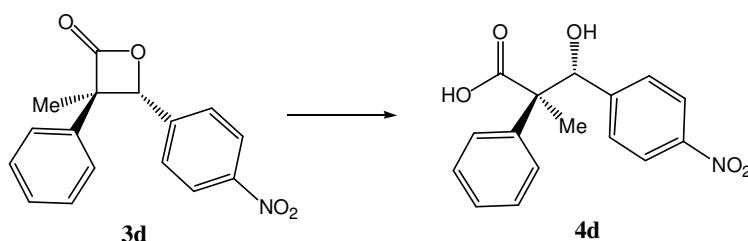

### (3R,4R)-3-Methyl-4-(4-nitrophenyl)-3-phenyloxetan-2-one (**3d**):

Following procedure A, methylphenylketene (46 mg, 0.35 mmol) was added to 4-nitrobenzaldehyde (53 mg, 0.35 mmol) and (*R*)-BINAPHANE (24

mg, 0.035 mmol). Eluting with 20% EtOAc/hexane through a plug column of neutral silica followed by solvent removal under reduced pressure afforded **3d** as a colorless oil (90 mg, 80% purity by  $^1\text{H}$  NMR), dr 95:5 (by  $^1\text{H}$  NMR of **4d**); HPLC analysis: 92% ee [Daicel Chiralpak AS-H column; 1.0 mL/min; solvent system: 8% isopropanol in hexane; retention times: 22.4 min (major), 33.7 min (minor)].

**(2R,3R)-3-Hydroxy-2-methyl-3-(4-nitrophenyl)-2-phenylpropanoic acid (**4d**):** Procedure B was followed employing **3d** (90 mg, 80% purity), aqueous KOH (0.51 mL, 0.51 mmol) and a reaction time 4 h. Elution with 20% EtOAc/hexane followed by solvent removal under reduced pressure yielded **4d** as a white gum (66 mg, 63% yield for two steps), dr 95:5 (by  $^1\text{H}$  NMR);  $[\alpha]_D^{25} = -126.0$  ( $c = 0.44$ , EtOAc); IR ( $\text{CHCl}_3$ ): 3553, 3021, 1695, 1521, 1349, 1216  $\text{cm}^{-1}$ ;  $^1\text{H}$  NMR (400 MHz,  $\text{CDCl}_3$ , TMS):  $\delta$  7.91 (d,  $J = 8.8$  Hz, 2H), 7.36-7.29 (m, 3H), 7.21-7.15 (m,

2H), 6.89 (d,  $J = 8.7$  Hz, 2H), 5.56 (s, 1H), 1.56 (s, 3H);  $^{13}\text{C}$  NMR (100 MHz,  $\text{CDCl}_3$ ):  $\delta$  182.0, 147.4, 145.8, 138.3, 129.1, 128.6, 128.5, 126.9, 122.4, 77.6, 56.4, 14.2; ( $\text{M}^+ + \text{Na}$ ) HRMS  $m/z$  calcd for  $\text{C}_{16}\text{H}_{15}\text{NO}_5\text{Na}$ : 324.0842; Found: 324.0843.

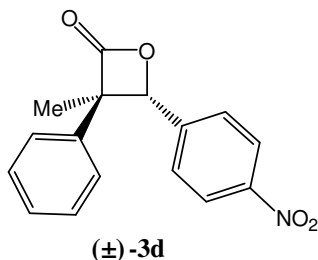

**(±)-3-Methyl-4-(4-nitrophenyl)-3-phenyloxetan-2-one (3d):**

Following procedure A, methylphenylketene (44 mg, 0.33 mmol) was added to 4-nitrobenzaldehyde (50 mg, 0.33 mmol) and  $n\text{-Bu}_3\text{P}$  (7 mg, 0.033 mmol). Elution with 20% EtOAc/hexane through a plug column of neutral silica gel followed by recrystallization of the crude product from acetone/hexane afforded **(±)-3d** as a colorless solid (58 mg, 61% yield, >99% purity by  $^1\text{H}$  NMR), dr >99:1 (by  $^1\text{H}$  NMR); mp: 124-125 °C; IR ( $\text{CHCl}_3$ ): 3021, 1835, 1526, 1350, 1216  $\text{cm}^{-1}$ ;  $^1\text{H}$  NMR (400 MHz,  $\text{CDCl}_3$ , TMS):  $\delta$  8.36 (d,  $J = 8.5$  Hz, 2H), 7.63 (d,  $J = 8.4$  Hz, 2H), 7.51-7.44 (m, 4H), 7.43-7.37 (m, 1H), 5.80 (s, 1H), 1.27 (s, 3H);  $^{13}\text{C}$  NMR (100 MHz,  $\text{CDCl}_3$ ):  $\delta$  171.7, 148.4, 142.2, 138.8, 129.7, 128.6, 126.7, 125.6, 124.4, 81.8, 65.5, 20.4.

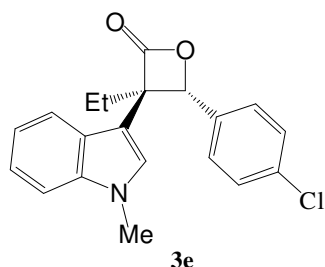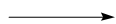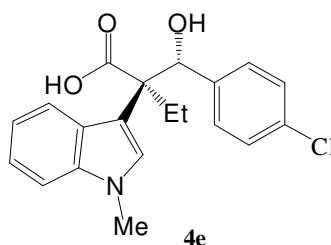

**(3R,4R)-4-(4-Chlorophenyl)-3-ethyl-3-(1-methyl-1H-indol-3-yl)oxetan-2-one (3e):**

Following procedure A, 1-methylindol-3-ylethylketene (72 mg, 0.36 mmol) was added to 4-chlorobenzaldehyde (50.6 mg, 0.36 mmol) and (*R*)-BINAPHANE (25 mg, 0.036 mmol). **3e** was obtained as a yellow oil (115 mg, 90% purity by  $^1\text{H}$  NMR), dr 83:17 (by HPLC analysis); HPLC analysis: for major diastereoisomer >99% ee [Daicel Chiralpak AD column; 1 mL/min; solvent system: 2% isopropanol in hexane; retention times: 12.6 min (major), 14.0 min (minor)].

**(2R)-2-((R)-(4-Chlorophenyl)hydroxymethyl)-2-(1-methyl-1H-indol-3-yl)butanoic acid (4e):**

Procedure B was followed employing **3e** (115 mg, 90% purity), aqueous KOH (0.61 mL, 0.61 mmol) and a reaction time of 11 hours. Elution with 25% EtOAc/hexane, followed by solvent removal under reduced pressure yielded **4e** as a yellow gum (97 mg, 75% yield for two steps), dr 83:17 (by  $^1\text{H}$  NMR);  $[\alpha]_D^{24} = -10.8$  ( $c = 0.06$ ,  $\text{CHCl}_3$ ); IR (thin film): 3420, 2918, 1646  $\text{cm}^{-1}$ ;  $^1\text{H}$  NMR (400 MHz,  $\text{CDCl}_3$ , TMS)  $\delta$  7.56 (d,  $J = 8.0$  Hz, 1H), 7.24 (d,  $J = 8\text{Hz}$ , 1H), 7.18 (s, 1H), 7.15 (d,  $J = 8.0$  Hz, 1H), 7.03 (d,  $J = 8.0$  Hz, 1H), 6.96 (d,  $J = 8.0$  Hz, 2H), 6.57 (d,  $J = 8.0$  Hz, 2H), 5.36 (s, 1H), 3.63 (s, 3H), 1.99-1.86 (m, 2H), 0.99 (t,  $J = 8.0$  Hz, 3H);  $^{13}\text{C}$  NMR (100 MHz,  $\text{CDCl}_3$ )  $\delta$  180.2, 138.2, 137.3, 133.7, 129.7, 129.4, 127.7, 127.5, 122.2, 122.0, 119.4, 110.2, 109.8, 77.8, 57.5, 33.1, 27.0, 9.7; ( $\text{M}^+ + \text{Na}$ ) HRMS  $m/z$  calcd for  $\text{C}_{20}\text{H}_{20}\text{ClNO}_3\text{Na}$ : 380.1024; Found: 380.1022.

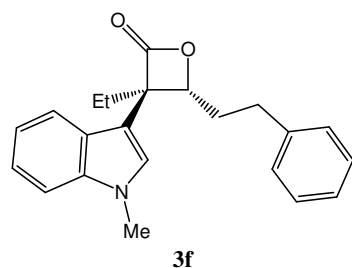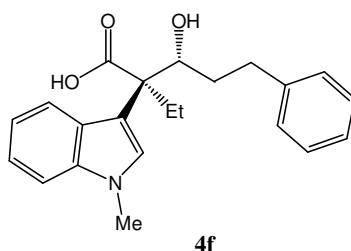

**(3R,4R)-3-Ethyl-3-(1-methyl-1H-indol-3-yl)-4-(2-phenylethyl)-xetan-2-one (3f):**

Following procedure **A**, ethyl-*N*-methylindolylketene (45 mg, 0.23 mmol) was added to hydrocinnamaldehyde (93

mg, 0.69 mmol) and (*R*)-BINAPHANE (16 mg, 0.023 mmol). Eluting with 15% EtOAc/hexane through a plug column of neutral silica followed by solvent removal under reduced pressure afforded **3f** as a colorless oil (70 mg, 90% purity by  $^1\text{H}$  NMR), dr >99:1 (by  $^1\text{H}$  NMR); HPLC analysis: 97% ee [Daicel Chiralpak AS-H column; 0.5 mL/min; solvent system: 5% isopropanol in hexane; retention times: 19.8 min (minor), 21.0 min (major)].

**(2R,3R)-2-Ethyl-3-hydroxy-2-(1-methyl-1H-indol-3-yl)-5-phenylpentanoic acid (4f):**

Procedure **B** was followed employing **3f** (70 mg, 90% purity), aqueous KOH (0.38 mL, 0.38 mmol) and a reaction time of 17 h. Elution with 30% EtOAc/hexane followed by solvent removal under reduced pressure yielded **4f** as a light yellow gum (48 mg, 61% yield for two steps), dr >99:1 (by  $^1\text{H}$  NMR);  $[\alpha]_D^{25} = 2.4$  ( $c = 0.19$ , EtOAc); IR ( $\text{CHCl}_3$ ): 3457, 3018, 1704, 1217  $\text{cm}^{-1}$ ;  $^1\text{H}$  NMR (400 MHz,  $\text{CDCl}_3$ , TMS):  $\delta$  7.61 (d,  $J = 8.0$  Hz, 1H), 7.30-7.02 (m, 8H), 6.95 (s, 1H), 4.27 (dd,  $J = 10.6, 1.4$  Hz, 1H), 3.72 (s, 3H), 2.87-2.77 (m, 1H), 2.65-2.53 (m, 1H), 2.35-2.09 (m, 2H), 1.87-1.76 (m, 1H), 1.49-1.37 (m, 1H), 0.86 (t,  $J = 7.5$  Hz, 3H);  $^{13}\text{C}$  NMR (100 MHz,  $\text{CDCl}_3$ ):  $\delta$  180.1, 142.2, 137.4, 128.8, 128.7, 128.5, 127.0, 126.0, 121.8, 121.5, 119.6, 111.4, 109.7, 74.4, 56.7, 34.1, 33.1, 32.7, 28.0, 9.6; ( $\text{M}^+ + \text{Na}$ ) HRMS  $m/z$  calcd for  $\text{C}_{22}\text{H}_{25}\text{NO}_3\text{Na}$ : 374.1727; Found: 374.1725.

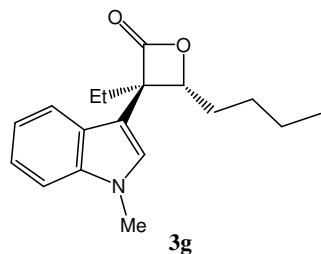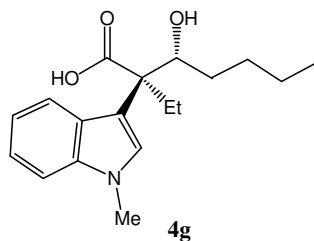

**(3R,4R)-4-Butyl-3-ethyl-3-(1-methyl-1H-indol-3-yl) xetan-2-one (3g):**

Following procedure **A**, ethyl-*N*-methylindolylketene (46 mg, 0.23 mmol) was added to pentanal (60 mg, 0.69 mmol) and (*R*)-BINAPHANE (16 mg, 0.023 mmol). Eluting with 15%

EtOAc/hexane through a plug column of neutral silica followed by solvent removal under reduced pressure afforded **3g** as a yellowish oil (62 mg, 90% purity by  $^1\text{H}$  NMR), dr >99:1 (by  $^1\text{H}$  NMR); HPLC analysis: 93% ee [Daicel Chiralpak AS-H column; 0.5 mL/min; solvent system: 5% isopropanol in hexane; retention times: 14.8 min (minor), 16.5 min (major)].

**(2R,3R)-2-Ethyl-3-hydroxy-2-(1-methyl-1H-indol-3-yl)heptanoic acid (4g):**

Procedure **B** was followed employing **3g** (62 mg, 90% purity), aqueous KOH (0.40 mL, 0.40 mmol) and a reaction time of 20 h. Elution with 30% EtOAc/hexane followed by solvent removal under reduced pressure yielded **4g** as a light yellow gum (41 mg, 59% yield for two steps), dr >99:1 (by  $^1\text{H}$  NMR);  $[\alpha]_D^{24} = -2.7$  ( $c = 0.09$ , EtOAc); IR ( $\text{CHCl}_3$ ): 3535, 2957, 1702, 1216  $\text{cm}^{-1}$ ;  $^1\text{H}$  NMR (400 MHz,  $\text{CDCl}_3$ , TMS):  $\delta$  7.67 (d,  $J = 8.2$  Hz, 1H), 7.30 (d,  $J = 8.4$  Hz, 1H), 7.21 (td,  $J = 8.2, 1.1$  Hz, 1H), 7.16 (s, 1H), 7.07 (ddd,  $J = 8.1, 7.0, 1.0$  Hz, 1H), 4.27 (dd,  $J = 10.5, 1.4$  Hz, 1H), 3.78 (s, 3H), 2.40-2.19 (m, 2H), 1.56-1.40 (m, 2H), 1.34-1.05 (m, 4H), 0.94 (t,  $J = 7.2$  Hz, 3H), 0.81 (t,  $J = 7.1$  Hz, 3H);  $^{13}\text{C}$  NMR (100 MHz,  $\text{CDCl}_3$ ):  $\delta$  179.6, 137.5, 129.0, 127.0, 121.8, 121.6, 119.5, 111.5, 109.7, 75.7, 57.1, 33.1, 32.1, 28.8, 27.9, 22.7, 14.3, 9.8; ( $\text{M}^+ + \text{Na}$ ) HRMS  $m/z$  calcd for  $\text{C}_{18}\text{H}_{25}\text{NO}_3\text{Na}$ : 326.1727; Found: 326.1726.

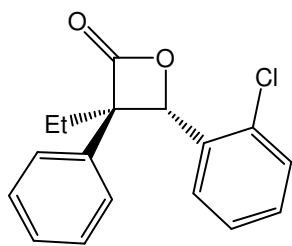**3h****(3*R*,4*S*)-4-(2-Chlorophenyl)-3-ethyl-3-phenyloxetan-2-one (3h):**

Following procedure A, ethylphenylketene (57 mg, 0.39 mmol) was added to 2-chlorobenzaldehyde (55 mg, 0.39 mmol) and (*R*)-BINAPHANE (27 mg, 0.039 mmol). **3h** was obtained as a colorless oil (112 mg, >99%), dr 75:25 (by  $^1\text{H}$  NMR);  $[\alpha]_D^{24} = -84.0$  ( $c = 0.15$ ,  $\text{CHCl}_3$ ); IR (thin film): 2973, 1829, 1109  $\text{cm}^{-1}$ ;  $^1\text{H}$  NMR (400 MHz,  $\text{CDCl}_3$ , TMS) for the major diastereoisomer  $\delta$  7.58-6.92 (m, 9H), 5.91 (s, 1H), 2.42-2.30 (m, 2H), 1.02 (t,  $J = 14.8$  Hz, 3H);  $^{13}\text{C}$  NMR (100 MHz,  $\text{CDCl}_3$ ) for the major diastereoisomer  $\delta$  172.2, 134.5, 133.8, 132.0, 129.9, 129.5, 129.0, 128.5, 127.7, 127.6, 126.9, 79.5, 72.0, 30.4, 9.5; MS (EI=70 eV)  $m/z$  242, 146, 117; ( $\text{M}^+ + \text{Na}$ ) HRMS  $m/z$  calcd for  $\text{C}_{17}\text{H}_{15}\text{ClO}_2\text{Na}$ : 309.065; Found: 309.0657.

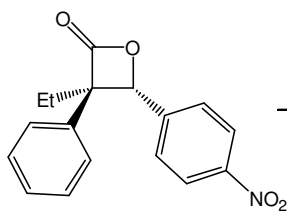**3i**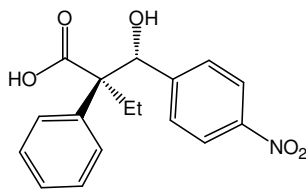**4i****(3*R*,4*R*)-3-Ethyl-4-(4-nitrophenyl)-3-phenyloxetan-2-one (3i):**

Following procedure A, ethylphenylketene (50 mg, 0.34 mmol) was added to 4-nitrobenzaldehyde (52 mg, 0.34 mmol) and (*R*)-BINAPHANE (24 mg, 0.034 mmol). Eluting with 20%

EtOAc/hexane through a plug column of neutral silica followed by solvent removal under reduced pressure afforded **3i** as a colorless oil (93 mg, 75% purity by  $^1\text{H}$  NMR), dr 80:20 (by HPLC); HPLC analysis: 87% ee (major isomer) [Daicel Chiralpak AS-H column; 0.5 mL/min; solvent system: 10% isopropanol in hexane; retention times for major isomer: 27.9 min (minor), 40.1 min (major)].

**(2*R*)-2-((*R*)-(Hydroxy(4-nitrophenyl)methyl))-2-phenylbutanoic acid (4i):**

Procedure B was followed employing **3i** (93 mg, 75% purity), aqueous KOH (0.47 mL, 0.47 mmol) and a reaction time 4 of h. Elution with 20% EtOAc/hexane followed by solvent removal under reduced pressure yielded **4i** as a white gum (55 mg, 51% yield for two steps), dr >95:5 (by  $^1\text{H}$  NMR);  $[\alpha]_D^{24} = -47.5$  ( $c = 0.32$ , EtOAc); IR ( $\text{CHCl}_3$ ): 3522, 3025, 1703, 1522, 1349, 1218  $\text{cm}^{-1}$ ;  $^1\text{H}$  NMR (400 MHz,  $\text{CDCl}_3$ , TMS):  $\delta$  7.95 (d,  $J = 9.0$  Hz, 2H), 7.36-7.28 (m, 3H), 7.09-7.02 (m, 2H), 6.93 (d,  $J = 8.9$  Hz, 2H), 5.45 (s, 1H), 2.22-1.91 (m, 2 H), 1.15 (t,  $J = 7.5$  Hz, 3H);  $^{13}\text{C}$  NMR (100 MHz,  $\text{CDCl}_3$ ):  $\delta$  181.1, 147.5, 146.1, 138.1, 128.8, 128.7, 128.2, 128.0, 122.6, 78.7, 60.5, 24.1, 10.3; ( $\text{M}^+ + \text{Na}$ ) HRMS  $m/z$  calcd for  $\text{C}_{17}\text{H}_{17}\text{NO}_5\text{Na}$ : 338.0999; Found: 338.0998.

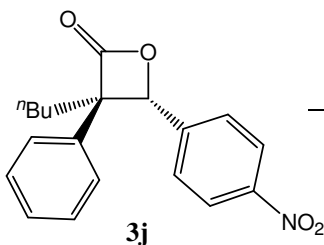**3j**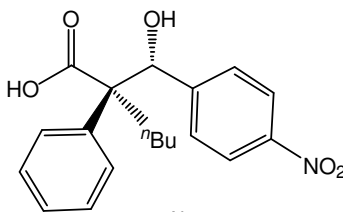**4j****(3*R*,4*R*)-3-Butyl-4-(4-nitrophenyl)-3-phenyloxetan-2-one (3j):**

Following procedure A, *n*-butylphenylketene (62 mg, 0.35 mmol) was added to 4-nitrobenzaldehyde (54 mg, 0.35

mmol) and (*R*)-BINAPHANE (25 mg, 0.035 mmol). **3j** was obtained as a white solid (123 mg, 94% purity by GC/MS), dr 47:53 (by HPLC analysis); HPLC analysis: 61% ee for the major diastereoisomer [Daicel Chiralpak AS-H column; 0.5 mL/min; solvent system: 2% isopropanol in hexane; retention times: 20.8 min (major), 22.1 min (minor)] and 96% ee for the minor diastereoisomer [Daicel Chiralpak AS-H column; 0.5 mL/min; solvent system: 2% isopropanol in hexane; retention times: 25.5 min (minor), 29.8 min (major)].



**(2*R*)-2-((*R*)-Hydroxy(4-nitrophenyl)methyl)-2-phenylhexanoic acid (4j):** General procedure **B** was followed employing **3j** (123 mg, 94% purity), aqueous KOH (0.71 mL, 0.71 mmol) and a reaction time of 4 h. Elution with 30% EtOAc/hexane followed by solvent removal under reduced pressure yielded **4j** as a white gum (121 mg, 99% yield for two steps). **4j** was isolated in two fractions, the first fraction (105 mg) being a mixture of diastereoisomers and the second fraction (16 mg) being enriched with the major diastereoisomer. Fractions were characterized separately; IR (thin film): 3429, 2917, 1647  $\text{cm}^{-1}$ ;  $^1\text{H}$  NMR (400 MHz,  $\text{CDCl}_3$ , TMS) for the mixture of diastereoisomers  $\delta$  7.89 (d,  $J = 8$  Hz, 2H), 7.28-7.21 (m, 3H), 6.99-6.98 (m, 4H), 6.94 (d,  $J = 8.0$  Hz, 2H), 6.84 (d,  $J = 8.0$  Hz, 2H), 6.76 (d,  $J = 12.0$  Hz, 2H), 5.40 (s, 1H), 5.38 (s, 1H), 2.08-1.06 (m, 12H), 1.60-0.90 (t,  $J = 6.0$  Hz, 3H), 0.85 (t,  $J = 6.0$  Hz, 3H);  $^{13}\text{C}$  NMR (100 MHz,  $\text{CDCl}_3$ ) for the mixture of diastereoisomers  $\delta$  180.2, 179.1, 147.7, 147.5, 146.0, 145.9, 138.3, 135.8, 129.1, 129.1, 128.8, 128.3, 128.3, 128.1, 127.9, 127.8, 123.3, 122.6, 77.5, 75.7, 60.2, 60.1, 33.8, 30.9, 27.2, 26.2, 23.8, 23.4, 14.1, 14.1;  $^1\text{H}$  NMR (400 MHz,  $\text{CDCl}_3$ , TMS) for the major diastereoisomer  $\delta$  7.89 (d,  $J = 8$  Hz, 2H), 7.29-7.14 (m, 3H), 6.94 (d,  $J = 8.0$  Hz, 2H), 6.76 (d,  $J = 12.0$  Hz, 2H), 5.40 (s, 1H), 2.08-1.75 (m, 2H), 1.60-1.06 (m, 4H), 0.90 (t,  $J = 6.0$  Hz, 3H);  $^{13}\text{C}$  NMR (100 MHz,  $\text{CDCl}_3$ ) for the major diastereoisomer  $\delta$  180.2, 147.7, 145.9, 135.8, 129.1, 129.1, 128.3, 128.1, 122.6, 75.7, 60.2, 33.8, 27.2, 23.4, 14.1. ( $\text{M}^+ + \text{Na}$ ) HRMS  $m/z$  calcd for  $\text{C}_{16}\text{H}_{15}\text{NO}_5\text{Na}$ : 366.1312; Found: 366.1310.

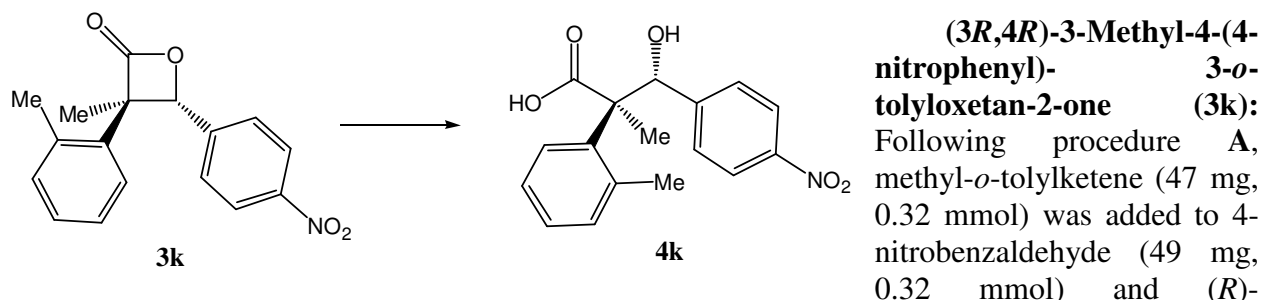

**(2*R*,3*R*)-3-Hydroxy-2-methyl-3-(4-nitrophenyl)-2-*p*-tolylpropanoic acid (4k):** Procedure **B** was followed employing **3k** (90 mg, 90% purity), aqueous KOH (0.55 mL, 0.55 mmol) and a reaction time of 5 h. Elution with 30% EtOAc/hexane followed by solvent removal under reduced pressure yielded **4k** as a yellowish gum (73 mg, 72% yield for two steps), dr >99:1 (by  $^1\text{H}$  NMR);  $[\alpha]_D^{24} = 101.2$  ( $c = 0.45$ , EtOAc); IR ( $\text{CHCl}_3$ ): 3497, 3020, 1689, 1522, 1350  $\text{cm}^{-1}$ ;  $^1\text{H}$  NMR (400 MHz,  $\text{CDCl}_3$ , TMS):  $\delta$  7.88 (d,  $J = 8.8$  Hz, 2H), 7.18-7.27 (m, 2H), 6.96 (t,  $J = 7.4$  Hz, 1H), 6.85 (d,  $J = 8.8$  Hz, 2H), 6.62 (d,  $J = 8.0$  Hz, 1H), 5.59 (s, 1H), 2.50 (s, 3H), 1.66 (s, 3H);  $^{13}\text{C}$  NMR (100 MHz,  $\text{CDCl}_3$ ):  $\delta$  184.3, 147.3, 145.6, 136.6, 136.0, 132.2, 128.7, 128.5, 127.6, 126.7, 122.3, 74.4, 54.8, 21.0, 17.7; ( $\text{M}^+ + \text{Na}$ ) HRMS  $m/z$  calcd for  $\text{C}_{17}\text{H}_{17}\text{NO}_5\text{Na}$ : 338.0999; Found: 338.0998.

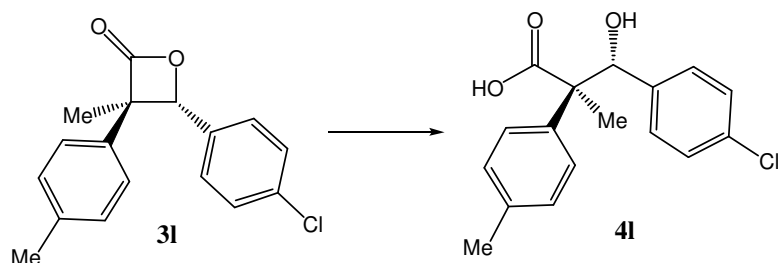

**(3R,4R)-4-(4-Chlorophenyl)-3-methyl-3-p-tolylloxetan-2-one (3l):** Following procedure A, methyl-*p*-tolylketene (41 mg, 0.28 mmol) was added to 4-chlorobenzaldehyde (39 mg, 0.28 mmol) and (*R*)-BINAPHANE (20 mg, 0.028 mmol). **3l** was

obtained as a colorless oil (80 mg, 85% purity by  $^1\text{H}$  NMR), dr 92:8 (by  $^1\text{H}$  NMR of **4l**); HPLC analysis: 84% ee [Daicel Chiralpak AS-H column; 0.5 mL/min; solvent system: 10% isopropanol in hexane; retention times: 14.8 min (major), 21.6 min (minor)].

**(2R,3R)-3-Hydroxy-2-methyl-3-(4-nitrophenyl)-2-p-tolylpropanoic acid (4l):** Procedure B was followed employing **3l** (80 mg, 85% purity), aqueous KOH (0.47 mL, 0.47 mmol), and a reaction time of 6 h. Elution with 20% EtOAc/hexane followed by solvent removal under reduced pressure yielded **4l** as a white gum (62 mg, 72% yield for two steps), dr 92:8 (by  $^1\text{H}$  NMR);  $[\alpha]_D^{24} = -151.2$  ( $c = 0.17$ , EtOAc); IR (CHCl<sub>3</sub>): 3513, 3020, 1699, 1215 cm<sup>-1</sup>;  $^1\text{H}$  NMR [Major] (400 MHz, CDCl<sub>3</sub>, TMS):  $\delta$  7.16-7.01 (m, 6H), 6.69 (d,  $J = 8.4$  Hz, 2H), 5.39 (s, 1H), 2.33 (s, 3H), 1.49 (s, 3H);  $^{13}\text{C}$  NMR [Major] (100 MHz, CDCl<sub>3</sub>):  $\delta$  182.3, 137.9, 136.9, 135.9, 133.3, 129.5, 129.0, 127.5, 126.9, 77.7, 56.1, 21.2, 14.6; ( $\text{M}^+ + \text{Na}$ ) HRMS  $m/z$  calcd for C<sub>17</sub>H<sub>17</sub>ClO<sub>3</sub>Na: 327.0758; Found: 327.0756.

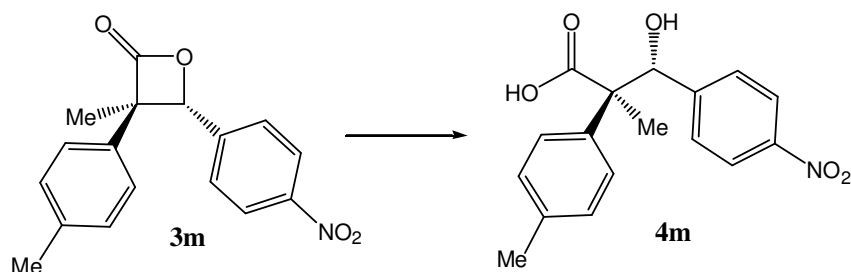

**(3R,4R)-3-Methyl-4-(4-nitrophenyl)-3-p-tolylloxetan-2-one (3m):** Following procedure A, methyl-*p*-tolylketene (45 mg, 0.31 mmol) was added to 4-nitrobenzaldehyde (47 mg, 0.31 mmol) and (*R*)-

BINAPHANE (22 mg, 0.031 mmol). Eluting with 20% EtOAc/hexane through a plug column of neutral silica followed by solvent removal under reduced pressure afforded **3m** as a light yellow oil (85 mg, 70% purity by  $^1\text{H}$  NMR), dr 90:10 (by  $^1\text{H}$  NMR of **4m**); HPLC analysis: 85% ee [Daicel Chiralpak AS-H column; 1.0 mL/min; solvent system: 8% isopropanol in hexane; retention times: 20.5 min (major), 29.5 min (minor)].

**(2R,3R)-3-Hydroxy-2-methyl-3-(4-nitrophenyl)-2-p-tolylpropanoic acid (4m):** Procedure B was followed employing **3m** (85 mg, 70% purity), aqueous KOH (0.40 mL, 0.40 mmol) and a reaction time of 6 h. Elution with 25% EtOAc/hexane followed by solvent removal under reduced pressure yielded **4m** as a yellowish gum (53 mg, 55% yield for two steps), dr 90:10 (by  $^1\text{H}$  NMR);  $[\alpha]_D^{25} = -123.1$  ( $c = 0.18$ , EtOAc); IR (CHCl<sub>3</sub>): 3495, 3021, 1704, 1521, 1349 cm<sup>-1</sup>;  $^1\text{H}$  NMR [Major] (400 MHz, CDCl<sub>3</sub>, TMS):  $\delta$  7.92 (d,  $J = 8.8$  Hz, 2H), 7.19-7.03 (m, 4H), 6.92 (d,  $J = 8.8$  Hz, 2H), 5.55 (s, 1H), 2.37 (s, 3H), 1.53 (s, 3H);  $^{13}\text{C}$  NMR [Major] (100 MHz, CDCl<sub>3</sub>):  $\delta$  182.2, 147.4, 145.9, 138.4, 135.3, 129.7, 128.6, 126.8, 122.4, 77.5, 56.1, 21.3, 14.3; ( $\text{M}^+ + \text{Na}$ ) HRMS  $m/z$  calcd for C<sub>17</sub>H<sub>17</sub>NO<sub>5</sub>Na: 338.0999; Found: 338.0997.

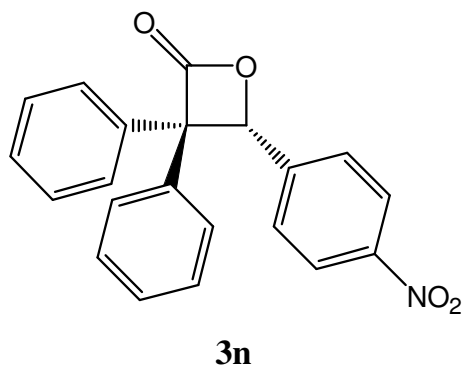

**(4R)-4-(4-Nitrophenyl)-3,3-diphenyloxetan-2-one (3n):** Following procedure A, diphenylketene (40 mg, 0.21 mmol) was added to 4-nitrobenzaldehyde (31 mg, 0.21 mmol) and (*R*)-BINAPHANE (15 mg, 0.021 mmol). Elution with 20% EtOAc/hexane through a plug column of neutral silica gel followed by recrystallization of the crude product from EtOAc/hexane afforded **3n** as a colorless crystalline solid (44 mg, 62% yield), HPLC analysis: 96% ee [Daicel Chiralpak AS-H column; 1.0 mL/min; solvent system: 15% isopropanol in hexane; retention times: 20.4 min (minor), 29.6 min (major)]; mp: 167-168 °C;  $[\alpha]_D^{25} =$

218.8 (c = 0.44, EtOAc); IR (CHCl<sub>3</sub>): 3021, 1834, 1525, 1352, 1216 cm<sup>-1</sup>; <sup>1</sup>H NMR (400 MHz, CDCl<sub>3</sub>, TMS): δ 8.06 (dt, *J* = 8.7, 2.2 Hz, 2H), 7.56 (dt, *J* = 8.0, 2.3 Hz, 2H), 7.47 (tt, *J* = 7.9, 2.1 Hz, 2H), 7.38 (tt, *J* = 8.6, 2.2 Hz, 3H), 7.09-7.04 (m, 3H), 6.98-6.92 (m, 2H), 6.34 (s, 1H); <sup>13</sup>C NMR (100 MHz, CDCl<sub>3</sub>): δ 170.0, 148.0, 142.1, 137.9, 135.0, 129.5, 128.8, 128.7, 128.2, 127.7, 127.6, 127.1, 123.6, 81.7, 75.6; MS (EI 70 eV) *m/z* 301, 253, 165, 126, 91; (M<sup>+</sup>+Na) HRMS *m/z* calcd for C<sub>21</sub>H<sub>15</sub>NO<sub>4</sub>Na: 368.0893; Found: 368.0894.

## Control Reactions and Mechanistic Studies:

**Quantitative Generation of phosphonium enolate from diphenyl ketene and reaction with 4-nitrobenzaldehyde:** *n*-Bu<sub>3</sub>P (89 mg, 0.46 mmol) was added to a solution of diphenylketene (98 mg, 0.46 mmol) in CH<sub>2</sub>Cl<sub>2</sub> (0.92 mL) at -78 °C. <sup>31</sup>P NMR (162 MHz, 85% H<sub>3</sub>PO<sub>4</sub>) showed complete consumption of *n*-Bu<sub>3</sub>P and gave a signal at 13.4 ppm, then 4-nitrobenzaldehyde (71 mg, 0.46 mmol) in CH<sub>2</sub>Cl<sub>2</sub> (0.50 mL) was added to the phosphonium enolate solution at -78 °C and the reaction was allowed to warm up to room temperature in the cooling bath over five hours. GCMS analysis of the reaction showed no β-lactone formation.

**<sup>31</sup>P NMR study of the reaction of *n*-Bu<sub>3</sub>P and 4-nitrobenzaldehyde:** *n*-Bu<sub>3</sub>P (17 mg, 0.084 mmol) was added to a solution of 4-nitrobenzaldehyde (127 mg, 0.84 mmol) in CH<sub>2</sub>Cl<sub>2</sub> (1 mL) at -78 °C; <sup>31</sup>P NMR (162 MHz, 85% H<sub>3</sub>PO<sub>4</sub>) analysis of the reaction solution at -78 °C showed a signal for *n*-Bu<sub>3</sub>P at δ -31 ppm.

**<sup>31</sup>P NMR study of the reaction of *n*-Bu<sub>3</sub>P, 4-nitrobenzaldehyde and diphenylketene:** *n*-Bu<sub>3</sub>P (10 mg, 0.048 mmol) was added to a solution of diphenylketene (73 mg, 0.48 mmol) and 4-nitrobenzaldehyde (94 mg, 0.48 mmol) in CH<sub>2</sub>Cl<sub>2</sub> (1.2 mL) at -78 °C; <sup>31</sup>P NMR (162 MHz, 85% H<sub>3</sub>PO<sub>4</sub>) analysis of the reaction solution at -78 °C: δ 13.4, 28.2 ppm, 34.2 ppm.<sup>5,6,7</sup>

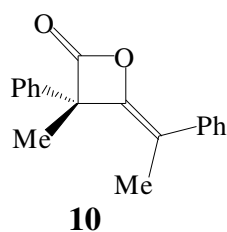

### **(S,Z)-3-Methyl-3-phenyl-4-(1-phenylethylidene)oxetan-2-one:**

Methylphenylketene (57 mg, 0.39 mmol) was dissolved in CH<sub>2</sub>Cl<sub>2</sub> (0.35 mL) and was cooled to -78 °C. (*R*)-BINAPHANE (27 mg, 0.04 mmol) was dissolved in CH<sub>2</sub>Cl<sub>2</sub> (0.35 mL) and cooled to -78 °C. The phosphine solution was then transferred via syringe to the flask containing the ketoketene solution. The reaction was stirred at -78 °C for 5 hours, after which the solvent was removed under reduced pressure. The crude material

was dissolved in 10% EtOAc/hexane (12 mL) and CH<sub>2</sub>Cl<sub>2</sub> (3 mL) and passed through a plug of neutral silica (6 g, 2×2 cm), eluting with 10% EtOAc/hexane (100 mL). The solvent was then removed under reduced pressure to yield **10** as a colorless oil (46 mg, 81%); HPLC analysis: 31% ee [Daicel Chiralpak AD column; 1 mL/min; λ=255 nm; solvent system: 2% isopropanol in

## SI-12

hexane; retention times: 4.8 min (minor), 6.7 min (major)];  $[\alpha]_D^{24} = -24.5$  ( $c = 0.30$ ,  $\text{CHCl}_3$ )<sup>7</sup>; IR (thin film): 1881, 1844, 1699, 1140  $\text{cm}^{-1}$ ;  $^1\text{H}$  NMR (200 MHz,  $\text{CDCl}_3$ , TMS):  $\delta$  7.52-7.16 (m, 10H), 1.92 (s, 3H), 1.86 (s, 3H);  $^{13}\text{C}$  NMR (50 MHz,  $\text{CDCl}_3$ ):  $\delta$  171.4, 146.9, 136.2, 135.2, 129.4, 128.6, 128.6, 127.6, 127.4, 126.3, 108.6, 64.4, 19.6, 15.6; MS (EI 70 eV):  $m/z$  264, 132, 104, 78; ( $\text{M}^+ + \text{Na}$ ) HRMS  $m/z$  calcd for  $\text{C}_{18}\text{H}_{16}\text{O}_2\text{Na}$ : 287.1043; found: 287.1039.

1. Armarego, W. L. F.; Perrin, D. D. *Purification of Laboratory Chemicals*, 4<sup>th</sup> ed., Butterworth Heinemann, 2002.
2. Hodous, B. L.; Fu, G. C. *J. Am. Chem. Soc.* **2002**, *124*, 10006-10007.
3. Wiskur, S. L.; Fu, G. C. *J. Am. Chem. Soc.* **2005**, *127*, 6176-6177.
4. Allen, A. D.; Baigrie, L. M.; Gong, L.; Tidwell, T. T. *Can. J. Chem.* **1991**, *69*, 138-145.
5. Ibrahim, A. A.; Harzmann, G. D.; Kerrigan, N. J. *J. Org. Chem.*, **2009**, *74*, 1777-1780.
6. Vedejs, E.; Diver, S. T. *J. Am. Chem. Soc.* **1993**, *115*, 3358-3359.
7. Lv, H.; Zang, Y. R.; Huang, X. L.; Ye, S. *Adv. Synth. Catal.* **2008**, *350*, 2715-2718.

Determination of *trans* Relative Stereochemistry:X-Ray Crystal Structure for Compound ( $\pm$ )-**3d**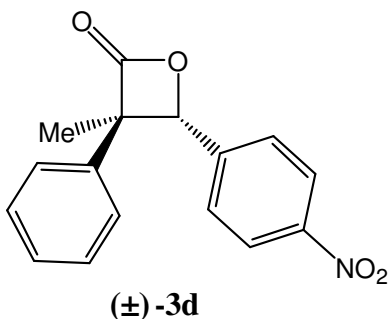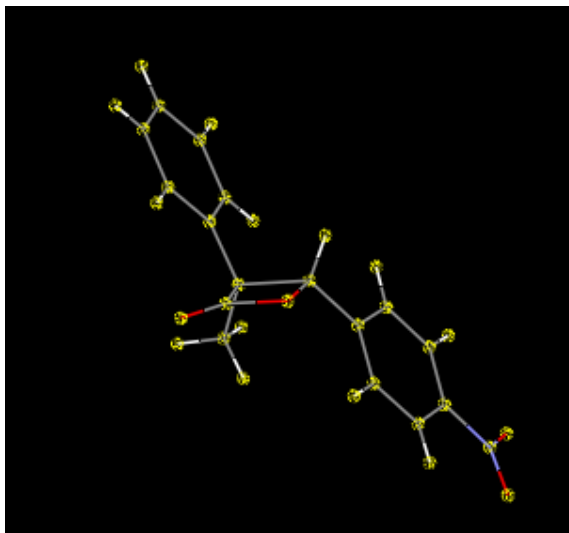

A colorless solution of crude ( $\pm$ )-**3d** in acetone/hexane (1:4) was prepared. Crystals suitable for X-ray structure analysis were obtained from this on standing.

A clear colourless plate-like specimen of  $C_{16}H_{13}NO_4$ , approximate dimensions 0.09 mm x 0.13 mm x 0.33 mm, was used for the X-ray crystallographic analysis. The X-ray intensity data were measured.

A total of 2668 frames were collected. The total exposure time was 7.41 hours. The frames were integrated with the Bruker SAINT software package using a narrow-frame algorithm. The integration of the data using an orthorhombic unit cell yielded a total of 14868 reflections to a maximum  $\theta$  angle of  $68.19^\circ$  ( $0.83 \text{ \AA}$  resolution), of which 2392 were independent (average redundancy 6.216, completeness = 97.0%,  $R_{\text{int}} = 4.82\%$ ,  $R_{\text{sig}} = 3.01\%$ ) and 1843 (77.05%) were greater than  $2\sigma(F^2)$ . The final cell constants of  $a = 24.6054(4) \text{ \AA}$ ,  $b = 7.01010(10) \text{ \AA}$ ,  $c = 15.5516(2) \text{ \AA}$ , volume =  $2682.44(7) \text{ \AA}^3$ , are based upon the refinement of the XYZ-centroids of 1166 reflections above  $20 \sigma(I)$  with  $7.183^\circ < 2\theta < 130.0^\circ$ . Data were corrected for absorption effects using the multi-scan method (SADABS). The ratio of minimum to maximum apparent transmission was 0.781. The calculated minimum and maximum transmission coefficients (based on crystal size) are 0.7665 and 0.9278.

The structure was solved and refined using the Bruker SHELXTL Software Package, using the space group  $P c c n$ , with  $Z = 8$  for the formula unit,  $C_{16}H_{13}NO_4$ . The final anisotropic full-matrix least-squares refinement on  $F^2$  with 191 variables converged at  $R1 = 3.91\%$ , for the observed data and  $wR2 = 10.37\%$  for all data. The goodness-of-fit was 1.042. The largest peak in the final difference electron density synthesis was  $0.229 \text{ e}^-/\text{\AA}^3$  and the largest hole was  $-0.222 \text{ e}^-/\text{\AA}^3$  with an RMS deviation of  $0.042 \text{ e}^-/\text{\AA}^3$ . On the basis of the final model, the calculated density was  $1.403 \text{ g/cm}^3$  and  $F(000)$ , 1184  $e^-$ .

**Table 1. Sample and crystal data for 3d**

|                     |                    |
|---------------------|--------------------|
| Identification code | 3d                 |
| Chemical formula    | $C_{16}H_{13}NO_4$ |
| Formula weight      | 283.27             |

# SI-14

|                               |                           |                     |
|-------------------------------|---------------------------|---------------------|
| <b>Temperature</b>            | 100(2) K                  |                     |
| <b>Wavelength</b>             | 1.54178 Å                 |                     |
| <b>Crystal size</b>           | 0.09 x 0.13 x 0.33 mm     |                     |
| <b>Crystal habit</b>          | clear colourless plate    |                     |
| <b>Crystal system</b>         | orthorhombic              |                     |
| <b>Space group</b>            | P c c n                   |                     |
|                               | a = 24.6054(4) Å          | $\alpha = 90^\circ$ |
| <b>Unit cell dimensions</b>   | b = 7.01010(10) Å         | $\beta = 90^\circ$  |
|                               | c = 15.5516(2) Å          | $\gamma = 90^\circ$ |
| <b>Volume</b>                 | 2682.44(7) Å <sup>3</sup> |                     |
| <b>Z</b>                      | 8                         |                     |
| <b>Density (calculated)</b>   | 1.403 Mg/cm <sup>3</sup>  |                     |
| <b>Absorption coefficient</b> | 0.846 mm <sup>-1</sup>    |                     |
| <b>F(000)</b>                 | 1184                      |                     |

**Table 2. Data collection and structure refinement for 3d**

|                                            |                                                                                                                                                               |
|--------------------------------------------|---------------------------------------------------------------------------------------------------------------------------------------------------------------|
| <b>Theta range for data collection</b>     | 3.59 to 68.19°                                                                                                                                                |
| <b>Index ranges</b>                        | -29<=h<=25, -7<=k<=6, -18<=l<=16                                                                                                                              |
| <b>Reflections collected</b>               | 14868                                                                                                                                                         |
| <b>Independent reflections</b>             | 2392 [R(int) = 0.0482]                                                                                                                                        |
| <b>Coverage of independent reflections</b> | 97.0%                                                                                                                                                         |
| <b>Absorption correction</b>               | multi-scan                                                                                                                                                    |
| <b>Max. and min. transmission</b>          | 0.9278 and 0.7665                                                                                                                                             |
| <b>Structure solution technique</b>        | direct methods                                                                                                                                                |
| <b>Structure solution program</b>          | SHELXS-97 (Sheldrick, 1990)                                                                                                                                   |
| <b>Refinement method</b>                   | Full-matrix least-squares on F <sup>2</sup>                                                                                                                   |
| <b>Refinement program</b>                  | SHELXL-97 (Sheldrick, 1997)                                                                                                                                   |
| <b>Function minimized</b>                  | $\Sigma w(F_o^2 - F_c^2)^2$                                                                                                                                   |
| <b>Data / restraints / parameters</b>      | 2392 / 0 / 191                                                                                                                                                |
| <b>Goodness-of-fit on F<sup>2</sup></b>    | 1.042                                                                                                                                                         |
| <b><math>\Delta/\sigma_{\max}</math></b>   | 0.001                                                                                                                                                         |
|                                            | 1843 data; R1 = 0.0391,                                                                                                                                       |
| <b>Final R indices</b>                     | I>2σ(I) wR2 = 0.0956                                                                                                                                          |
|                                            | all data R1 = 0.0560,                                                                                                                                         |
|                                            | wR2 = 0.1037                                                                                                                                                  |
| <b>Weighting scheme</b>                    | w=1/[σ <sup>2</sup> (F <sub>o</sub> <sup>2</sup> )+(0.0533P) <sup>2</sup> +0.7123P]<br>where P=(F <sub>o</sub> <sup>2</sup> +2F <sub>c</sub> <sup>2</sup> )/3 |
| <b>Largest diff. peak and hole</b>         | 0.229 and -0.222 eÅ <sup>-3</sup>                                                                                                                             |
| <b>R.M.S. deviation from mean</b>          | 0.042 eÅ <sup>-3</sup>                                                                                                                                        |

**Table 3. Atomic coordinates and equivalent isotropic atomic displacement parameters ( $\text{\AA}^2$ ) for 3d**

U(eq) is defined as one third of the trace of the orthogonalized  $U_{ij}$  tensor.

|     | x/a         | y/b         | z/c         | U(eq)     |
|-----|-------------|-------------|-------------|-----------|
| O1  | 0.59128(5)  | 0.20915(17) | 0.88318(8)  | 0.0284(2) |
| O2  | 0.67093(6)  | 0.0511(2)   | 0.85968(8)  | 0.0358(2) |
| O3  | 0.52573(6)  | 0.7966(2)   | 0.22741(8)  | 0.0367(4) |
| O4  | 0.53880(6)  | 0.0483(2)   | 0.14947(8)  | 0.0348(2) |
| N1  | 0.53697(6)  | 0.8754(2)   | 0.15881(9)  | 0.0282(4) |
| C1  | 0.64462(8)  | 0.1946(2)   | 0.86051(11) | 0.0284(4) |
| C2  | 0.65289(6)  | 0.4058(2)   | 0.84292(11) | 0.0261(4) |
| C3  | 0.59127(6)  | 0.4173(2)   | 0.86756(11) | 0.0256(4) |
| C4  | 0.69259(8)  | 0.4999(2)   | 0.90607(11) | 0.0304(4) |
| C5  | 0.57547(6)  | 0.5306(2)   | 0.94534(10) | 0.0243(4) |
| C6  | 0.56884(6)  | 0.4477(2)   | 0.02624(11) | 0.0259(4) |
| C7  | 0.55498(6)  | 0.5591(2)   | 0.09655(11) | 0.0263(4) |
| C8  | 0.54939(6)  | 0.7529(2)   | 0.08453(11) | 0.0252(4) |
| C9  | 0.55623(6)  | 0.8396(2)   | 0.00524(11) | 0.0260(4) |
| C10 | 0.56859(6)  | 0.7260(2)   | 0.93515(11) | 0.0253(4) |
| C11 | 0.66617(6)  | 0.4588(2)   | 0.75036(11) | 0.0267(4) |
| C12 | 0.66823(8)  | 0.6494(2)   | 0.72724(12) | 0.0322(4) |
| C13 | 0.67970(8)  | 0.7022(2)   | 0.64314(12) | 0.0361(5) |
| C14 | 0.68930(8)  | 0.5654(2)   | 0.58158(12) | 0.0373(5) |
| C15 | 0.68727(10) | 0.3773(2)   | 0.60407(12) | 0.0468(5) |
| C16 | 0.67595(9)  | 0.3222(2)   | 0.68835(12) | 0.0401(5) |

**Table 4. Bond lengths ( $\text{\AA}$ ) for 3d**

|        |          |        |          |
|--------|----------|--------|----------|
| O1-C1  | 1.363(2) | O1-C3  | 1.479(2) |
| O2-C1  | 1.196(2) | O3-N1  | 1.233(2) |
| O4-N1  | 1.221(2) | N1-C8  | 1.472(2) |
| C1-C2  | 1.520(3) | C2-C11 | 1.522(2) |
| C2-C4  | 1.534(2) | C2-C3  | 1.566(3) |
| C3-C5  | 1.498(2) | C3-H3  | 1.0      |
| C4-H4A | 0.98     | C4-H4B | 0.98     |
| C4-H4C | 0.98     | C5-C10 | 1.390(3) |
| C5-C6  | 1.395(2) | C6-C7  | 1.386(2) |
| C6-H6  | 0.95     | C7-C8  | 1.379(3) |
| C7-H7  | 0.95     | C8-C9  | 1.385(2) |
| C9-C10 | 1.384(2) | C9-H9  | 0.95     |

# SI-16

|         |          |         |          |
|---------|----------|---------|----------|
| C10-H10 | 0.95     | C11-C16 | 1.381(3) |
| C11-C12 | 1.384(3) | C12-C13 | 1.388(3) |
| C12-H12 | 0.95     | C13-C14 | 1.375(3) |
| C13-H13 | 0.95     | C14-C15 | 1.365(3) |
| C14-H14 | 0.95     | C15-C16 | 1.395(3) |
| C15-H15 | 0.95     | C16-H16 | 0.95     |

**Table 5. Bond angles (°) for 3d**

|             |            |             |            |
|-------------|------------|-------------|------------|
| C1-O1-C3    | 91.82(13)  | O4-N1-O3    | 123.79(15) |
| O4-N1-C8    | 118.56(15) | O3-N1-C8    | 117.65(16) |
| O2-C1-O1    | 125.94(18) | O2-C1-C2    | 138.16(18) |
| O1-C1-C2    | 95.88(14)  | C1-C2-C11   | 115.91(15) |
| C1-C2-C4    | 112.89(15) | C11-C2-C4   | 111.33(15) |
| C1-C2-C3    | 82.89(13)  | C11-C2-C3   | 115.26(15) |
| C4-C2-C3    | 115.96(15) | O1-C3-C5    | 112.99(14) |
| O1-C3-C2    | 89.39(13)  | C5-C3-C2    | 118.41(15) |
| O1-C3-H3    | 111.4      | C5-C3-H3    | 111.4      |
| C2-C3-H3    | 111.4      | C2-C4-H4A   | 109.5      |
| C2-C4-H4B   | 109.5      | H4A-C4-H4B  | 109.5      |
| C2-C4-H4C   | 109.5      | H4A-C4-H4C  | 109.5      |
| H4B-C4-H4C  | 109.5      | C10-C5-C6   | 119.94(16) |
| C10-C5-C3   | 117.54(15) | C6-C5-C3    | 122.50(16) |
| C7-C6-C5    | 120.36(17) | C7-C6-H6    | 119.8      |
| C5-C6-H6    | 119.8      | C8-C7-C6    | 118.21(16) |
| C8-C7-H7    | 120.9      | C6-C7-H7    | 120.9      |
| C7-C8-C9    | 122.77(16) | C7-C8-N1    | 119.31(16) |
| C9-C8-N1    | 117.90(16) | C10-C9-C8   | 118.38(17) |
| C10-C9-H9   | 120.8      | C8-C9-H9    | 120.8      |
| C9-C10-C5   | 120.29(16) | C9-C10-H10  | 119.9      |
| C5-C10-H10  | 119.9      | C16-C11-C12 | 118.81(17) |
| C16-C11-C2  | 121.90(17) | C12-C11-C2  | 119.29(16) |
| C11-C12-C13 | 120.62(18) | C11-C12-H12 | 119.7      |
| C13-C12-H12 | 119.7      | C14-C13-C12 | 120.3(2)   |
| C14-C13-H13 | 119.8      | C12-C13-H13 | 119.8      |
| C15-C14-C13 | 119.3(2)   | C15-C14-H14 | 120.4      |
| C13-C14-H14 | 120.4      | C14-C15-C16 | 121.1(2)   |
| C14-C15-H15 | 119.5      | C16-C15-H15 | 119.5      |
| C11-C16-C15 | 119.9(2)   | C11-C16-H16 | 120.0      |
| C15-C16-H16 | 120.0      |             |            |



**Table 6. Torsion angles (°) for 3d**

|                 |             |                 |             |
|-----------------|-------------|-----------------|-------------|
| C3-O1-C1-O2     | 179.90(18)  | C3-O1-C1-C2     | 1.09(13)    |
| O2-C1-C2-C11    | 65.7(3)     | O1-C1-C2-C11    | -115.71(16) |
| O2-C1-C2-C4     | -64.4(3)    | O1-C1-C2-C4     | 114.19(15)  |
| O2-C1-C2-C3     | -179.6(2)   | O1-C1-C2-C3     | -1.04(13)   |
| C1-O1-C3-C5     | -121.88(15) | C1-O1-C3-C2     | -1.06(13)   |
| C1-C2-C3-O1     | 0.95(12)    | C11-C2-C3-O1    | 116.30(15)  |
| C4-C2-C3-O1     | -111.09(16) | C1-C2-C3-C5     | 116.95(16)  |
| C11-C2-C3-C5    | -127.70(17) | C4-C2-C3-C5     | 4.9(2)      |
| O1-C3-C5-C10    | -173.34(15) | C2-C3-C5-C10    | 84.2(2)     |
| O1-C3-C5-C6     | 8.1(2)      | C2-C3-C5-C6     | -94.4(2)    |
| C10-C5-C6-C7    | 0.5(3)      | C3-C5-C6-C7     | 179.03(16)  |
| C5-C6-C7-C8     | -1.6(3)     | C6-C7-C8-C9     | 1.0(3)      |
| C6-C7-C8-N1     | -177.45(15) | O4-N1-C8-C7     | 171.01(16)  |
| O3-N1-C8-C7     | -8.4(2)     | O4-N1-C8-C9     | -7.5(2)     |
| O3-N1-C8-C9     | 173.12(16)  | C7-C8-C9-C10    | 0.7(3)      |
| N1-C8-C9-C10    | 179.21(16)  | C8-C9-C10-C5    | -1.9(3)     |
| C6-C5-C10-C9    | 1.3(3)      | C3-C5-C10-C9    | -177.31(16) |
| C1-C2-C11-C16   | -6.8(3)     | C4-C2-C11-C16   | 124.0(2)    |
| C3-C2-C11-C16   | -101.3(2)   | C1-C2-C11-C12   | 172.78(17)  |
| C4-C2-C11-C12   | -56.4(2)    | C3-C2-C11-C12   | 78.4(2)     |
| C16-C11-C12-C13 | 0.3(3)      | C2-C11-C12-C13  | -179.35(18) |
| C11-C12-C13-C14 | -0.2(3)     | C12-C13-C14-C15 | 0.2(3)      |
| C13-C14-C15-C16 | -0.4(3)     | C12-C11-C16-C15 | -0.5(3)     |
| C2-C11-C16-C15  | 179.2(2)    | C14-C15-C16-C11 | 0.5(4)      |

**Table 7. Anisotropic atomic displacement parameters (Å<sup>2</sup>) for 3d**

The anisotropic atomic displacement factor exponent takes the form:  $-2\pi^2 [h^2 a^{*2} U_{11} + \dots + 2 h k a^* b^* U_{12}]$

|    | U <sub>11</sub> | U <sub>22</sub> | U <sub>33</sub> | U <sub>23</sub> | U <sub>13</sub> | U <sub>12</sub> |
|----|-----------------|-----------------|-----------------|-----------------|-----------------|-----------------|
| O1 | 0.0310(8)       | 0.0242(7)       | 0.0299(5)       | -0.0019(5)      | 0.0012(5)       | -0.0007(5)      |
| O2 | 0.0411(8)       | 0.0293(8)       | 0.0372(7)       | -0.0009(5)      | -0.0008(5)      | 0.0065(5)       |
| O3 | 0.0476(9)       | 0.0415(9)       | 0.0209(5)       | 0.0006(5)       | 0.0059(5)       | -0.0079(5)      |
| O4 | 0.0457(9)       | 0.0289(9)       | 0.0297(7)       | -0.0030(5)      | 0.0011(5)       | 0.0036(5)       |
| N1 | 0.0281(9)       | 0.0316(11)      | 0.0248(8)       | -0.0011(5)      | 0.0000(5)       | -0.0008(5)      |
| C1 | 0.0331(11)      | 0.0312(11)      | 0.0210(9)       | -0.0029(8)      | -0.0018(7)      | 0.0006(8)       |
| C2 | 0.0261(10)      | 0.0264(10)      | 0.0257(9)       | -0.0031(7)      | -0.0001(7)      | 0.0012(7)       |
| C3 | 0.0295(10)      | 0.0227(10)      | 0.0247(9)       | -0.0002(7)      | -0.0006(7)      | -0.0008(7)      |

## SI-18

|     | U <sub>11</sub> | U <sub>22</sub> | U <sub>33</sub> | U <sub>23</sub> | U <sub>13</sub> | U <sub>12</sub> |
|-----|-----------------|-----------------|-----------------|-----------------|-----------------|-----------------|
| C4  | 0.0296(11)      | 0.0343(11)      | 0.0273(10)      | -0.0025(8)      | -0.0012(8)      | -0.0004(8)      |
| C5  | 0.0205(10)      | 0.0289(10)      | 0.0234(9)       | 0.0001(7)       | -0.0008(7)      | -0.0010(7)      |
| C6  | 0.0252(10)      | 0.0240(10)      | 0.0285(9)       | 0.0024(7)       | -0.0011(7)      | -0.0016(7)      |
| C7  | 0.0264(10)      | 0.0310(11)      | 0.0216(9)       | 0.0029(7)       | -0.0014(7)      | -0.0040(7)      |
| C8  | 0.0235(10)      | 0.0304(11)      | 0.0218(9)       | -0.0029(7)      | 0.0001(7)       | -0.0014(7)      |
| C9  | 0.0260(10)      | 0.0249(10)      | 0.0272(9)       | 0.0008(7)       | -0.0009(7)      | -0.0005(7)      |
| C10 | 0.0254(10)      | 0.0277(10)      | 0.0229(9)       | 0.0024(7)       | 0.0012(7)       | -0.0012(7)      |
| C11 | 0.0226(10)      | 0.0330(11)      | 0.0246(9)       | -0.0031(7)      | -0.0004(7)      | -0.0010(7)      |
| C12 | 0.0356(11)      | 0.0312(11)      | 0.0297(9)       | -0.0027(8)      | 0.0060(8)       | 0.0002(8)       |
| C13 | 0.0329(11)      | 0.0407(13)      | 0.0346(10)      | 0.0075(9)       | 0.0040(8)       | 0.0007(8)       |
| C14 | 0.0311(11)      | 0.0548(14)      | 0.0260(10)      | 0.0005(9)       | 0.0030(8)       | -0.0005(9)      |
| C15 | 0.0621(16)      | 0.0504(15)      | 0.0279(10)      | -0.0122(10)     | 0.0057(10)      | -0.0002(11)     |
| C16 | 0.0555(14)      | 0.0330(11)      | 0.0318(10)      | -0.0046(9)      | 0.0028(9)       | -0.0031(9)      |

**Table 8. Hydrogen atomic coordinates and isotropic atomic displacement parameters ( $\text{\AA}^2$ ) for 3d**

|     | x/a    | y/b    | z/c    | U(eq) |
|-----|--------|--------|--------|-------|
| H3  | 0.5683 | 0.4513 | 0.8167 | 0.031 |
| H4A | 0.6829 | 0.4640 | 0.9650 | 0.046 |
| H4B | 0.6906 | 0.6388 | 0.9000 | 0.046 |
| H4C | 0.7297 | 0.4569 | 0.8936 | 0.046 |
| H6  | 0.5738 | 0.3142 | 1.0332 | 0.031 |
| H7  | 0.5495 | 0.5033 | 1.1515 | 0.032 |
| H9  | 0.5525 | 0.9738 | 0.9991 | 0.031 |
| H10 | 0.5724 | 0.7819 | 0.8798 | 0.03  |
| H12 | 0.6617 | 0.7449 | 0.7693 | 0.039 |
| H13 | 0.6809 | 0.8334 | 0.6280 | 0.043 |
| H14 | 0.6973 | 0.6015 | 0.5241 | 0.045 |
| H15 | 0.6937 | 0.2825 | 0.5616 | 0.056 |
| H16 | 0.6750 | 0.1907 | 0.7031 | 0.048 |

## Determination of Absolute Stereochemistry:

X-Ray Crystal Structure for Compound **3n**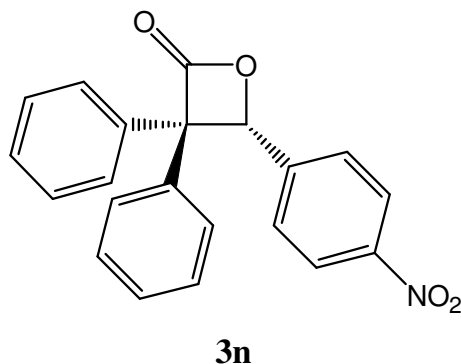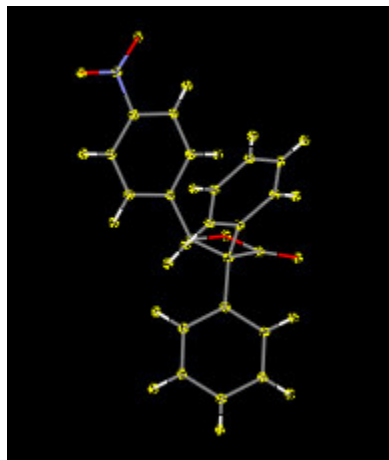

A colorless solution of crude **3n** in EtOAc/hexane (2:3) was prepared. Crystals suitable for X-ray structure analysis were obtained from this on standing.

A clear colourless rod-like specimen of  $C_{21}H_{15}NO_4$ , approximate dimensions 0.28 mm x 0.34 mm x 0.39 mm, was used for the X-ray crystallographic analysis. The X-ray intensity data were measured.

A total of 3681 frames were collected. The total exposure time was 5.11 hours. The frames were integrated with the Bruker SAINT software package using a narrow-frame algorithm. The integration of the data using an orthorhombic unit cell yielded a total of 24408 reflections to a maximum  $\theta$  angle of  $71.71^\circ$  ( $0.81 \text{ \AA}$  resolution), of which 3296 were independent (average redundancy 7.405, completeness = 99.9%,  $R_{\text{int}} = 2.49\%$ ,  $R_{\text{sig}} = 1.36\%$ ) and 3213 (97.48%) were greater than  $2\sigma(F^2)$ . The final cell constants of  $a = 9.51250(10) \text{ \AA}$ ,  $b = 10.85260(10) \text{ \AA}$ ,  $c = 16.4229(2) \text{ \AA}$ , volume =  $1695.42(3) \text{ \AA}^3$ , are based upon the refinement of the XYZ-centroids of 7955 reflections above  $20 \sigma(I)$  with  $8.146^\circ < 2\theta < 142.1^\circ$ . Data were corrected for absorption effects using the multi-scan method (SADABS). The ratio of minimum to maximum apparent transmission was 0.877. The calculated minimum and maximum transmission coefficients (based on crystal size) are 0.7534 and 0.8127.

**Table 1. Sample and crystal data for **3n****

|                      |                                |                     |
|----------------------|--------------------------------|---------------------|
| Identification code  | <b>3n</b>                      |                     |
| Chemical formula     | $C_{21}H_{15}NO_4$             |                     |
| Formula weight       | 345.34                         |                     |
| Temperature          | 100(2) K                       |                     |
| Wavelength           | 1.54178 $\text{\AA}$           |                     |
| Crystal size         | 0.28 x 0.34 x 0.39 mm          |                     |
| Crystal habit        | clear colourless rod           |                     |
| Crystal system       | orthorhombic                   |                     |
| Space group          | P 21 21 21                     |                     |
| Unit cell dimensions | $a = 9.51250(10) \text{ \AA}$  | $\alpha = 90^\circ$ |
|                      | $b = 10.85260(10) \text{ \AA}$ | $\beta = 90^\circ$  |

## SI-20

|                        |                              |                     |
|------------------------|------------------------------|---------------------|
|                        | $c = 16.4229(2) \text{ \AA}$ | $\gamma = 90^\circ$ |
| Volume                 | $1695.42(3) \text{ \AA}^3$   |                     |
| Z                      | 4                            |                     |
| Density (calculated)   | $1.353 \text{ Mg/cm}^3$      |                     |
| Absorption coefficient | $0.775 \text{ mm}^{-1}$      |                     |
| F(000)                 | 720                          |                     |

**Table 2. Data collection and structure refinement for 3n**

|                                     |                                                   |
|-------------------------------------|---------------------------------------------------|
| Theta range for data collection     | 4.88 to 71.71°                                    |
| Index ranges                        | -11 ≤ h ≤ 11, -13 ≤ k ≤ 13, -19 ≤ l ≤ 20          |
| Reflections collected               | 24408                                             |
| Independent reflections             | 3296 [R(int) = 0.0249]                            |
| Coverage of independent reflections | 99.9%                                             |
| Absorption correction               | multi-scan                                        |
| Max. and min. transmission          | 0.8127 and 0.7534                                 |
| Structure solution technique        | direct methods                                    |
| Structure solution program          | SHELXS-97 (Sheldrick, 1990)                       |
| Refinement method                   | Full-matrix least-squares on F <sup>2</sup>       |
| Refinement program                  | SHELXL-97 (Sheldrick, 1997)                       |
| Function minimized                  | $\sum w(F_o^2 - F_c^2)^2$                         |
| Data / restraints / parameters      | 3296 / 0 / 236                                    |
| Goodness-of-fit on F <sup>2</sup>   | 1.065                                             |
| $\Delta/\sigma_{\max}$              | 0.013                                             |
| Final R indices                     | 3213 data; R1 = 0.0266,                           |
|                                     | I > 2σ(I) wR2 = 0.0687                            |
| Weighting scheme                    | all data R1 = 0.0274,                             |
|                                     | wR2 = 0.0694                                      |
|                                     | $w = 1/[\sigma^2(F_o^2) + (0.0424P)^2 + 0.2177P]$ |
|                                     | where $P = (F_o^2 + 2F_c^2)/3$                    |
| Largest diff. peak and hole         | 0.174 and -0.176 eÅ <sup>-3</sup>                 |
| R.M.S. deviation from mean          | 0.037 eÅ <sup>-3</sup>                            |

**Table 3. Atomic coordinates and equivalent isotropic atomic displacement parameters (Å<sup>2</sup>) for 3n**

U(eq) is defined as one third of the trace of the orthogonalized U<sub>ij</sub> tensor.

|    | x/a        | y/b        | z/c        | U(eq)     |
|----|------------|------------|------------|-----------|
| O1 | 0.00270(9) | 0.35799(8) | 0.94346(5) | 0.0279(2) |
| O2 | 0.78038(9) | 0.30505(9) | 0.90528(5) | 0.0313(2) |
| O3 | 0.64386(9) | 0.34257(9) | 0.69770(6) | 0.0350(2) |

# SI-21

|     | x/a         | y/b         | z/c        | U(eq)     |
|-----|-------------|-------------|------------|-----------|
| O4  | 0.50517(10) | 0.48149(10) | 0.64865(6) | 0.0429(2) |
| N1  | 0.53405(11) | 0.40185(10) | 0.69900(6) | 0.0288(2) |
| C1  | 0.90298(12) | 0.28308(11) | 0.91095(6) | 0.0253(2) |
| C2  | 0.00172(12) | 0.17614(11) | 0.89128(6) | 0.0227(2) |
| C3  | 0.11489(12) | 0.26539(11) | 0.92984(6) | 0.0242(2) |
| C4  | 0.22896(12) | 0.31200(11) | 0.87531(6) | 0.0234(2) |
| C5  | 0.20635(12) | 0.40996(11) | 0.82228(6) | 0.0277(2) |
| C6  | 0.30803(12) | 0.44197(11) | 0.76572(8) | 0.0295(2) |
| C7  | 0.43069(12) | 0.37435(11) | 0.76315(6) | 0.0254(2) |
| C8  | 0.45868(12) | 0.27953(11) | 0.81690(6) | 0.0275(2) |
| C9  | 0.35665(12) | 0.24922(11) | 0.87344(6) | 0.0272(2) |
| C10 | 0.02259(11) | 0.15296(10) | 0.80083(6) | 0.0214(2) |
| C11 | 0.95137(12) | 0.22179(11) | 0.74232(6) | 0.0252(2) |
| C12 | 0.98550(13) | 0.20953(12) | 0.66037(6) | 0.0293(2) |
| C13 | 0.09129(12) | 0.12980(12) | 0.63652(6) | 0.0290(2) |
| C14 | 0.16104(12) | 0.05953(11) | 0.69453(6) | 0.0269(2) |
| C15 | 0.12604(12) | 0.07027(11) | 0.77628(6) | 0.0246(2) |
| C16 | 0.96604(12) | 0.06176(11) | 0.94087(6) | 0.0240(2) |
| C17 | 0.82716(12) | 0.01986(12) | 0.94124(6) | 0.0291(2) |
| C18 | 0.78946(14) | 0.91788(12) | 0.98716(8) | 0.0352(2) |
| C19 | 0.88887(17) | 0.85661(12) | 0.03338(8) | 0.0374(2) |
| C20 | 0.02684(17) | 0.89732(12) | 0.03302(8) | 0.0363(2) |
| C21 | 0.06575(13) | 0.99934(11) | 0.98698(6) | 0.0301(2) |

**Table 5. Bond lengths (Å) for 3n**

|         |            |         |            |
|---------|------------|---------|------------|
| O1-C1   | 1.3585(16) | O1-C3   | 1.4828(14) |
| O2-C1   | 1.1940(15) | O3-N1   | 1.2270(14) |
| O4-N1   | 1.2273(15) | N1-C7   | 1.4715(16) |
| C1-C2   | 1.5276(17) | C2-C10  | 1.5197(16) |
| C2-C16  | 1.5229(15) | C2-C3   | 1.5805(16) |
| C3-C4   | 1.4951(17) | C3-H3   | 1.0        |
| C4-C5   | 1.3910(17) | C4-C9   | 1.3930(17) |
| C5-C6   | 1.3854(18) | C5-H5   | 0.95       |
| C6-C7   | 1.3790(17) | C6-H6   | 0.95       |
| C7-C8   | 1.3817(17) | C8-C9   | 1.3830(18) |
| C8-H8   | 0.95       | C9-H9   | 0.95       |
| C10-C15 | 1.3915(17) | C10-C11 | 1.3929(17) |
| C11-C12 | 1.3908(17) | C11-H11 | 0.95       |
| C12-C13 | 1.384(2)   | C12-H12 | 0.95       |

# SI-22

|         |            |         |            |
|---------|------------|---------|------------|
| C13-C14 | 1.3891(18) | C13-H13 | 0.95       |
| C14-C15 | 1.3881(16) | C14-H14 | 0.95       |
| C15-H15 | 0.95       | C16-C21 | 1.3899(17) |
| C16-C17 | 1.3972(17) | C17-C18 | 1.386(2)   |
| C17-H17 | 0.95       | C18-C19 | 1.383(2)   |
| C18-H18 | 0.95       | C19-C20 | 1.385(2)   |
| C19-H19 | 0.95       | C20-C21 | 1.3908(18) |
| C20-H20 | 0.95       | C21-H21 | 0.95       |

**Table 6. Bond angles (°) for 3n**

|             |            |             |            |
|-------------|------------|-------------|------------|
| C1-O1-C3    | 92.16(8)   | O3-N1-O4    | 123.22(11) |
| O3-N1-C7    | 118.36(11) | O4-N1-C7    | 118.40(10) |
| O2-C1-O1    | 126.38(12) | O2-C1-C2    | 137.37(12) |
| O1-C1-C2    | 96.22(9)   | C10-C2-C16  | 114.64(9)  |
| C10-C2-C1   | 114.38(9)  | C16-C2-C1   | 111.66(9)  |
| C10-C2-C3   | 113.84(9)  | C16-C2-C3   | 115.91(9)  |
| C1-C2-C3    | 82.44(9)   | O1-C3-C4    | 112.54(9)  |
| O1-C3-C2    | 89.17(8)   | C4-C3-C2    | 117.50(9)  |
| O1-C3-H3    | 111.9      | C4-C3-H3    | 111.9      |
| C2-C3-H3    | 111.9      | C5-C4-C9    | 119.67(11) |
| C5-C4-C3    | 121.42(11) | C9-C4-C3    | 118.72(10) |
| C6-C5-C4    | 120.23(11) | C6-C5-H5    | 119.9      |
| C4-C5-H5    | 119.9      | C7-C6-C5    | 118.54(11) |
| C7-C6-H6    | 120.7      | C5-C6-H6    | 120.7      |
| C6-C7-C8    | 122.67(11) | C6-C7-N1    | 118.64(11) |
| C8-C7-N1    | 118.66(11) | C7-C8-C9    | 118.09(11) |
| C7-C8-H8    | 121.0      | C9-C8-H8    | 121.0      |
| C8-C9-C4    | 120.69(11) | C8-C9-H9    | 119.7      |
| C4-C9-H9    | 119.7      | C15-C10-C11 | 119.34(11) |
| C15-C10-C2  | 118.84(10) | C11-C10-C2  | 121.46(10) |
| C12-C11-C10 | 120.17(11) | C12-C11-H11 | 119.9      |
| C10-C11-H11 | 119.9      | C13-C12-C11 | 120.24(11) |
| C13-C12-H12 | 119.9      | C11-C12-H12 | 119.9      |
| C12-C13-C14 | 119.77(11) | C12-C13-H13 | 120.1      |
| C14-C13-H13 | 120.1      | C15-C14-C13 | 120.18(11) |
| C15-C14-H14 | 119.9      | C13-C14-H14 | 119.9      |
| C14-C15-C10 | 120.26(11) | C14-C15-H15 | 119.9      |
| C10-C15-H15 | 119.9      | C21-C16-C17 | 118.96(11) |
| C21-C16-C2  | 122.45(11) | C17-C16-C2  | 118.58(11) |
| C18-C17-C16 | 120.45(12) | C18-C17-H17 | 119.8      |

# SI-23

|             |            |             |            |
|-------------|------------|-------------|------------|
| C16-C17-H17 | 119.8      | C19-C18-C17 | 120.36(13) |
| C19-C18-H18 | 119.8      | C17-C18-H18 | 119.8      |
| C18-C19-C20 | 119.49(12) | C18-C19-H19 | 120.3      |
| C20-C19-H19 | 120.3      | C19-C20-C21 | 120.57(13) |
| C19-C20-H20 | 119.7      | C21-C20-H20 | 119.7      |
| C16-C21-C20 | 120.17(12) | C16-C21-H21 | 119.9      |
| C20-C21-H21 | 119.9      |             |            |

**Table 7. Torsion angles (°) for 3n**

|                 |             |                 |             |
|-----------------|-------------|-----------------|-------------|
| C3-O1-C1-O2     | 178.29(12)  | C3-O1-C1-C2     | -0.26(8)    |
| O2-C1-C2-C10    | 69.18(18)   | O1-C1-C2-C10    | -112.55(10) |
| O2-C1-C2-C16    | -63.09(18)  | O1-C1-C2-C16    | 115.19(10)  |
| O2-C1-C2-C3     | -178.03(15) | O1-C1-C2-C3     | 0.25(8)     |
| C1-O1-C3-C4     | 119.85(10)  | C1-O1-C3-C2     | 0.25(8)     |
| C10-C2-C3-O1    | 113.14(10)  | C16-C2-C3-O1    | -110.68(10) |
| C1-C2-C3-O1     | -0.22(7)    | C10-C2-C3-C4    | -1.99(15)   |
| C16-C2-C3-C4    | 134.18(11)  | C1-C2-C3-C4     | -115.36(11) |
| O1-C3-C4-C5     | -21.21(14)  | C2-C3-C4-C5     | 80.23(14)   |
| O1-C3-C4-C9     | 163.87(10)  | C2-C3-C4-C9     | -94.68(13)  |
| C9-C4-C5-C6     | 2.52(17)    | C3-C4-C5-C6     | -172.35(11) |
| C4-C5-C6-C7     | 0.33(18)    | C5-C6-C7-C8     | -2.8(2)     |
| C5-C6-C7-N1     | 175.27(11)  | O3-N1-C7-C6     | 179.00(11)  |
| O4-N1-C7-C6     | -2.20(17)   | O3-N1-C7-C8     | -2.83(16)   |
| O4-N1-C7-C8     | 175.97(11)  | C6-C7-C8-C9     | 2.33(18)    |
| N1-C7-C8-C9     | -175.76(11) | C7-C8-C9-C4     | 0.64(17)    |
| C5-C4-C9-C8     | -3.03(17)   | C3-C4-C9-C8     | 171.98(11)  |
| C16-C2-C10-C15  | -58.65(14)  | C1-C2-C10-C15   | 170.52(10)  |
| C3-C2-C10-C15   | 78.09(13)   | C16-C2-C10-C11  | 128.25(12)  |
| C1-C2-C10-C11   | -2.58(15)   | C3-C2-C10-C11   | -95.00(13)  |
| C15-C10-C11-C12 | -1.26(17)   | C2-C10-C11-C12  | 171.81(11)  |
| C10-C11-C12-C13 | -0.62(18)   | C11-C12-C13-C14 | 1.65(18)    |
| C12-C13-C14-C15 | -0.79(18)   | C13-C14-C15-C10 | -1.10(18)   |
| C11-C10-C15-C14 | 2.11(17)    | C2-C10-C15-C14  | -171.13(11) |
| C10-C2-C16-C21  | 100.44(13)  | C1-C2-C16-C21   | -127.42(12) |
| C3-C2-C16-C21   | -35.38(15)  | C10-C2-C16-C17  | -80.95(13)  |
| C1-C2-C16-C17   | 51.19(14)   | C3-C2-C16-C17   | 143.22(11)  |
| C21-C16-C17-C18 | 0.24(18)    | C2-C16-C17-C18  | -178.41(11) |
| C16-C17-C18-C19 | 0.2(2)      | C17-C18-C19-C20 | -0.5(2)     |
| C18-C19-C20-C21 | 0.3(2)      | C17-C16-C21-C20 | -0.41(18)   |
| C2-C16-C21-C20  | 178.19(11)  | C19-C20-C21-C16 | 0.1(2)      |

**Table 8. Anisotropic atomic displacement parameters ( $\text{\AA}^2$ ) for 3n**

The anisotropic atomic displacement factor exponent takes the form:  $-2\pi^2 [h^2 a^{*2} U_{11} + \dots + 2 h k a^* b^* U_{12}]$

|     | $U_{11}$  | $U_{22}$  | $U_{33}$  | $U_{23}$   | $U_{13}$   | $U_{12}$   |
|-----|-----------|-----------|-----------|------------|------------|------------|
| O1  | 0.0303(4) | 0.0265(4) | 0.0270(4) | -0.0023(2) | 0.0064(2)  | 0.0016(4)  |
| O2  | 0.0263(5) | 0.0365(5) | 0.0310(4) | 0.0072(4)  | 0.0088(4)  | 0.0058(4)  |
| O3  | 0.0219(4) | 0.0430(5) | 0.0401(5) | -0.0053(4) | 0.0023(4)  | 0.0003(4)  |
| O4  | 0.0347(5) | 0.0448(5) | 0.0494(5) | 0.0164(5)  | 0.0098(4)  | 0.0001(5)  |
| N1  | 0.0221(5) | 0.0307(5) | 0.0336(5) | -0.0042(4) | 0.0006(4)  | -0.0052(4) |
| C1  | 0.0277(5) | 0.0288(5) | 0.0194(5) | 0.0041(4)  | 0.0048(4)  | 0.0010(5)  |
| C2  | 0.0202(5) | 0.0260(5) | 0.0219(5) | 0.0010(4)  | -0.0007(4) | 0.0006(5)  |
| C3  | 0.0275(5) | 0.0240(5) | 0.0211(5) | -0.0009(4) | -0.0022(5) | 0.0005(5)  |
| C4  | 0.0241(5) | 0.0242(5) | 0.0220(5) | -0.0034(4) | -0.0034(4) | -0.0026(5) |
| C5  | 0.0233(5) | 0.0266(5) | 0.0330(5) | 0.0021(5)  | 0.0004(5)  | 0.0021(5)  |
| C6  | 0.0268(5) | 0.0267(5) | 0.0351(5) | 0.0065(5)  | 0.0003(5)  | -0.0009(5) |
| C7  | 0.0214(5) | 0.0274(5) | 0.0274(5) | -0.0034(5) | -0.0010(5) | -0.0057(5) |
| C8  | 0.0212(5) | 0.0307(5) | 0.0305(5) | -0.0038(5) | -0.0050(5) | 0.0032(5)  |
| C9  | 0.0282(5) | 0.0280(5) | 0.0255(5) | 0.0018(5)  | -0.0056(5) | 0.0016(5)  |
| C10 | 0.0196(5) | 0.0231(5) | 0.0216(5) | -0.0010(4) | 0.0002(4)  | -0.0035(4) |
| C11 | 0.0242(5) | 0.0257(5) | 0.0257(5) | -0.0003(4) | -0.0007(5) | -0.0004(5) |
| C12 | 0.0353(7) | 0.0292(5) | 0.0235(5) | 0.0029(5)  | -0.0046(5) | -0.0019(5) |
| C13 | 0.0342(5) | 0.0312(5) | 0.0217(5) | -0.0020(5) | 0.0033(5)  | -0.0086(5) |
| C14 | 0.0237(5) | 0.0281(5) | 0.0290(5) | -0.0057(5) | 0.0032(5)  | -0.0030(5) |
| C15 | 0.0233(5) | 0.0251(5) | 0.0255(5) | -0.0004(4) | -0.0018(4) | -0.0015(5) |
| C16 | 0.0288(5) | 0.0254(5) | 0.0179(5) | -0.0008(4) | 0.0021(5)  | -0.0014(5) |
| C17 | 0.0296(5) | 0.0309(5) | 0.0267(5) | -0.0016(5) | 0.0016(5)  | -0.0013(5) |
| C18 | 0.0362(7) | 0.0353(7) | 0.0342(7) | -0.0017(5) | 0.0086(5)  | -0.0079(5) |
| C19 | 0.0566(9) | 0.0290(7) | 0.0265(5) | 0.0040(5)  | 0.0053(5)  | -0.0097(5) |
| C20 | 0.0527(9) | 0.0291(5) | 0.0270(5) | 0.0031(5)  | -0.0083(5) | -0.0013(5) |
| C21 | 0.0333(5) | 0.0277(5) | 0.0293(5) | 0.0005(5)  | -0.0058(5) | -0.0014(5) |

**Table 9. Hydrogen atomic coordinates and isotropic atomic displacement parameters ( $\text{\AA}^2$ ) for 3n**

|    | x/a    | y/b    | z/c    | U(eq) |
|----|--------|--------|--------|-------|
| H3 | 0.1530 | 0.2325 | 0.9823 | 0.029 |
| H5 | 0.1209 | 0.4551 | 0.8249 | 0.033 |
| H6 | 0.2936 | 0.5090 | 0.7295 | 0.035 |
| H8 | 0.5455 | 0.2364 | 0.8151 | 0.033 |



## SI-25

|     | <b>x/a</b> | <b>y/b</b> | <b>z/c</b> | <b>U(eq)</b> |
|-----|------------|------------|------------|--------------|
| H9  | 0.3738     | 0.1849     | 0.9114     | 0.033        |
| H11 | -0.1207    | 0.2773     | 0.7584     | 0.03         |
| H12 | -0.0640    | 0.2561     | 0.6206     | 0.035        |
| H13 | 0.1161     | 0.1232     | 0.5807     | 0.035        |
| H14 | 0.2329     | 0.0040     | 0.6782     | 0.032        |
| H15 | 0.1729     | 0.0210     | 0.8156     | 0.03         |
| H17 | -0.2419    | 0.0615     | 0.9098     | 0.035        |
| H18 | -0.3052    | -0.1101    | 0.9869     | 0.042        |
| H19 | -0.1373    | -0.2129    | 1.0651     | 0.045        |
| H20 | 0.0955     | -0.1448    | 1.0645     | 0.044        |
| H21 | 0.1607     | 0.0264     | 0.9871     | 0.036        |

The structure was solved and refined using the Bruker SHELXTL Software Package, using the space group P 21 21 21, with  $Z = 4$  for the formula unit,  $C_{21}H_{15}NO_4$ . The final anisotropic full-matrix least-squares refinement on  $F^2$  with 236 variables converged at  $R1 = 2.66\%$ , for the observed data and  $wR2 = 6.94\%$  for all data. The goodness-of-fit was 1.065. The largest peak in the final difference electron density synthesis was  $0.174 \text{ e}^-/\text{\AA}^3$  and the largest hole was  $-0.176 \text{ e}^-/\text{\AA}^3$  with an RMS deviation of  $0.037 \text{ e}^-/\text{\AA}^3$ . On the basis of the final model, the calculated density was  $1.353 \text{ g/cm}^3$  and  $F(000)$ , 720  $e^-$ .
